# Supplementary material
Source: PubMed Central journal article supplement (PMC3896919)

Activated Pancreatic Stellate Cells Sequester CD8+ T-Cells to Reduce Their Infiltration of  
the Juxtatumoral Compartment of Pancreatic Ductal Adenocarcinoma

Abasi Ene-Obong<sup>1</sup>, Andrew J. Clear<sup>2</sup>, Jennifer Watt<sup>1,4</sup>, Jun Wang<sup>3</sup>, Rewas Fatah<sup>2</sup>, John C.  
Riches<sup>2</sup>, John F. Marshall<sup>1</sup>, Joanne Chin-Aleong<sup>5</sup>, Claude Chelala<sup>3</sup>, John G. Gribben<sup>2</sup>, Alan  
G. Ramsay<sup>2</sup>, Hemant M. Kocher<sup>1,4</sup>

Centres for <sup>1</sup>Tumour Biology, <sup>2</sup>Hemato-Oncology & <sup>3</sup>Molecular Oncology, Barts Cancer  
Institute, Barts and The London School of Medicine and Dentistry, Queen Mary University of  
London, London EC1M 6BQ, UK; Departments of <sup>4</sup>Surgery and <sup>5</sup>Pathology, Barts and the  
London HPB Centre, The Royal London Hospital, Barts Health NHS Trust, London, E1 1BB,  
UK.

**SUPPLEMENTARY MATERIAL****Supplementary tables****Supplementary table 1: Pancreatico-biliary diseases: patient numbers on respective TMAs**

| Pancreatico-biliary disease | Number of patients |         |       |
|-----------------------------|--------------------|---------|-------|
|                             | Batch A            | Batch B | Total |
| Ampullary carcinoma         | 0                  | 9       | 9     |
| Cholangiocarcinoma          | 9                  | 12      | 21    |
| Chronic pancreatitis        | 0                  | 4       | 4     |
| Mucinous cystic neoplasm    | 0                  | 6       | 6     |
| Normal                      | 0                  | 14      | 14    |
| PDAC (resected)             | 63                 | 0       | 63    |
| PDAC (biopsy)               | 0                  | 35      | 35    |
| Total                       | 72                 | 80      | 152   |

**Supplementary table 2: Pancreatico-biliary diseases: patient characteristics**

| <b>Diagnosis</b>         | <b>n</b> | <b>Age:<br/>median<br/>(IQR)</b> | <b>Sex<br/>M:F</b> | <b>Tumor stage T (n)</b>         | <b>Nodal<br/>metastasis stage<br/>N (n)</b> |
|--------------------------|----------|----------------------------------|--------------------|----------------------------------|---------------------------------------------|
| Ampullary carcinoma      | 9        | 63 (58-79)                       | 4:5                | T1 (0), T2 (3), T3 (6), T4 (0)   | N0 (2), N1 (7)                              |
| Cholangiocarcinoma       | 21       | 61 (55-76)                       | 13:8               | T1 (0), T2 (6), T3 (13), T4 (0)  | N0 (2), N1 (19)                             |
| Chronic pancreatitis     | 4        | 55 (44-64)                       | 4:0                | NA                               | NA                                          |
| Mucinous cystic neoplasm | 6        | 48 (40-64)                       | 0:6                | NA                               | NA                                          |
| Resected PDAC            | 63       | 66 (60-77)                       | 30:33              | T1 (6), T2 (22), T3 (25), T4 (0) | N0 (24), N1 (39)                            |
| Advanced PDAC            | 35       | 67 (61-78)                       | 20:15              | NA                               | NA                                          |

**NA: Not applicable**

**Supplementary table 3: Details of antibodies used in immunohistochemistry (IHC), immunofluorescence (IF) and flow cytometry**

| Primary antibody         | Species raised in | Supplier                      | Dilution - IHC |
|--------------------------|-------------------|-------------------------------|----------------|
| CD3 (clone SP7)          | Rabbit            | Labvision (CD-3-SP7)          | 1:500          |
| CD4 (clone 4B12)         | Mouse             | Novacostra (NCL-CD4-368)      | 1:500          |
| CD8 (clone C8/144B)      | Mouse             | Dako (M7103)                  | 1:400          |
| CD20 (clone L26)         | Mouse             | Dako (M0755)                  | 1:2000         |
| CD56 (clone ERIC-1)      | Mouse             | Serotec (MCA591)              | 1:1200         |
| CD68 (clone KP1)         | Mouse             | Dako (M0814)                  | 1:8000         |
| FoxP3 (clone 263A/E7)    | Mouse             | Abcam (Ab20034)               | 1:100          |
| FN (clone FN-3E2)        | Mouse             | Sigma-Aldrich (F6140)         | 1:500          |
| Myeloperoxidase          | Rabbit            | Dako (A0398)                  | 1:8000         |
| CD11b (clone M1/70)      | Rat               | eBioscience (14-0112)         | 1:100          |
| Fibronectin              | Rabbit            | Abcam (ab299)                 | 1:100          |
| F4/80                    | Rat               | eBioscience (14-4801)         | 1:200          |
| CK (clone OV-TL 12/30)   | Mouse             | Dako (M701801-2)              | 1:200          |
| CD8 (clone C8/144B)      | Mouse             | Dako (M710301-2)              | 1:50           |
| CD8                      | Rat               | Pierce antibodies (MA1-70041) | 1:500          |
| $\alpha$ SMA (clone 1A4) | Mouse             | Dako (M085101-2)              | 1:100          |
| Antibodies               | Species raised in | Supplier                      | Dilution - IF  |
| CD3                      | Rabbit            | Abcam (ab5690)                | 1:20           |
| CD8                      | Rabbit            | Abcam (ab4055)                | 1:100          |
| Vimentin (C-20)          | Goat              | Santa Cruz (sc-7557)          | 1:100          |
| Alexa Fluor® 488         | Goat              | Invitrogen (A-11001)          | 1:2000         |
| Alexa Fluor® 555         | Rabbit            | Invitrogen (A-21431)          | 1:100          |
|                          |                   |                               |                |

**Antigen retrieval:** Heat induced epitope retrieval in pressure cooker using Citrate buffer at pH6.0 for 10 minutes.

| Primary antibody (clone) | Species raised in | Supplier (order number) | Conjugate       | Gene  |
|--------------------------|-------------------|-------------------------|-----------------|-------|
| CD3 (UCHT1)              | Mouse             | Biologend (300419)      | PE/Cy7          | CD3   |
| CD4 (RPA-T4)             | Mouse             | eBiosciences (47-0049)  | APC-eFlour® 780 | CD4   |
| CD8a (RPA-T8)            | Mouse             | eBiosciences (45-0088)  | PerCP-Cy5.5     | CD8   |
| CD184 (12G5)             | Mouse             | BD Pharmingen™ (560936) | APC             | CXCR4 |
| CD45RA (H100)            | Mouse             | BD Pharmingen™ (561882) | FITC            | PTPRC |
| CD197 (3D12)             | Rat               | eBioscience (12-1979)   | PE              | CCR7  |

**Supplementary table 4: KPC mice characteristics (all mice had tumor visible on ultrasound before enrolment)**

| Mouse number | Sex | Age (months) | Treatment |
|--------------|-----|--------------|-----------|
| 1            | F   | 5            | ATRA      |
| 2            | F   | 5.75         | ATRA      |
| 3            | F   | 5            | ATRA      |
| 4            | M   | 5.5          | ATRA      |
| 5            | M   | 3            | ATRA      |
| 6            | M   | 3            | ATRA      |
| 7            | M   | 7            | VEHICLE   |
| 8            | F   | 2            | VEHICLE   |
| 9            | F   | 6.75         | VEHICLE   |
| 10           | F   | 4.75         | VEHICLE   |

**Supplementary Table 5: Survival analyses of immune cell markers in PDAC**

| MARKER  | WHOLE TISSUE INFILTRATE |               |                         | JUXTATUMOURAL TISSUE INFILTRATE |               |                         | PANSTROMAL TISSUE INFILTRATE |               |                         | Inference |
|---------|-------------------------|---------------|-------------------------|---------------------------------|---------------|-------------------------|------------------------------|---------------|-------------------------|-----------|
|         | CUT OFF                 | P-VALUE       | Miller-Sigmuend p-value | CUT OFF                         | P-VALUE       | Miller-Sigmuend p-value | CUT OFF                      | P-VALUE       | Miller-Sigmuend p-value |           |
| CD3     | <0.12≥                  | <b>0.0151</b> | 0.2195                  | <0.14≥                          | 0.1069        | 1                       | <0.20≥                       | <b>0.018</b>  | 0.2482                  | ↓         |
| CD4     | <0.19≥                  | <b>0.0069</b> | 0.1217                  | <0.19≥                          | 0.0652        | 0.575                   | <0.16≥                       | <b>0.019</b>  | 0.2586                  | ↓         |
| CD8     | <0.07≥                  | <b>0.0302</b> | 0.3555                  | <0.05≥                          | <b>0.0455</b> | 0.4639                  | <0.09≥                       | 0.0614        | 0.5553                  | ↑         |
| FoxP3   | <0.06≥                  | <b>0.0016</b> | <b>0.0371</b>           | <0.03≥                          | <b>0.0019</b> | <b>0.0444</b>           | <0.05≥                       | <b>0.0253</b> | 0.316                   | ↓         |
| CD20    | <0.00≥                  | 0.0652        | 0.575                   | <0.01≥                          | 0.0544        | 0.5174                  | <0.05≥                       | <b>0.0128</b> | 0.1939                  | ↓         |
| CD56    | <0.02≥                  | <b>0.0114</b> | 0.1782                  | <0.03≥                          | <b>0.0359</b> | 0.3992                  | <0.03≥                       | 0.2059        | 1                       | ↑         |
| CD68    | <0.03≥                  | <b>0.0269</b> | 0.3288                  | <0.12≥                          | 0.138         | 1                       | <0.02≥                       | 0.1138        | 1                       | ↓         |
| CD4/CD8 | <2.00≥                  | <b>0.0455</b> | 0.4639                  | <3.30≥                          | 0.0783        | 0.6362                  | <4.60≥                       | 0.1797        | 1                       | ↓         |

**Supplementary Figure 1: Immune cell distribution in patients with normal histology, PDAC and cholangiocarcinoma.**

Panel shows representative TMA cores from normal pancreas (A, D, G), PDAC patients (B, E, H) and cholangiocarcinoma patients (C, F, I). The cores shown are stained by immunohistochemistry for H&E (A, B, C), CD3<sup>+</sup> T-cells (D, E, F) and CD8<sup>+</sup> T-cells (G, H, I).

There are very few CD3<sup>+</sup> and CD8<sup>+</sup> positively staining T-cells in the normal pancreas. In the PDAC cores CD3<sup>+</sup> and CD8<sup>+</sup> T-cells are seen to aggregate in the panstroma, with fewer CD3<sup>+</sup> and CD8<sup>+</sup> positive cells infiltrating the juxtatumoral stroma (J and K). In the cholangiocarcinoma cores CD3<sup>+</sup> and CD8<sup>+</sup> positive cells are evenly distributed throughout the tissues with no clear difference between the panstromal and juxtatumoral compartments.

The dotted line (J,K) represents the boundary of the juxtatumoral compartment 100  $\mu$ m margin from the tumor. Scale bars: A- I, 10 $\mu$ m; J-K, 20 $\mu$ m.

**Supplementary Figure 2: Double immunostain of CD8/ $\alpha$ -SMA and CK/ $\alpha$ -SMA on consecutive sections to demonstrate sequestration of CD8<sup>+</sup> T-cells in panstromal compartment**

Consecutive human tissue sections were doubly stained for CD8<sup>+</sup> (brown, DAB)/ $\alpha$ -SMA (purple, VIP) (A-D) and CK (brown, DAB)/ $\alpha$ -SMA (purple, VIP) (C-G). There is an abundance of CD8<sup>+</sup> T-cells in the panstromal compartment seemingly juxtaposed to  $\alpha$ -SMA<sup>+</sup> stromal cells (B, D) and few CD8<sup>+</sup> cells in the juxtatumoral compartment (C). Cancer cells are absent in the panstromal compartment where CD8<sup>+</sup> T-cells are densest (F). Scale bar: 100  $\mu$ m.



**Supplementary Figure 3: Comparison of immune cells density as performed in tissue microarray and whole tissue sections**

Immune cells were stained and analyzed as described in Supplementary Figure 1-2.

Immune cell densities (here for CD8<sup>+</sup> T-cells) were analyzed on TMAs (A) and whole tissue sections (B) using the Ariol microscope in an automated manner after training for color, shape and size on multiple areas. Box (median with interquartile ranges (25<sup>th</sup> and 75<sup>th</sup>)) and whisker (5<sup>th</sup> and 95<sup>th</sup> centiles) plots demonstrate similar results.

The density of immune cell infiltrate was carried out by two distinct methods: as a proportion of negative (non-stained for the marker: in this case for FoxP3<sup>+</sup>) cells (C) and as a percentage of all cells (D). Box (median with interquartile ranges (25<sup>th</sup> and 75<sup>th</sup>)) and whisker (5<sup>th</sup> and 95<sup>th</sup> centiles) plots gave same results.

(E) Further analysis of density of immune cells (in this case for CD68<sup>+</sup>) was given by the stromal compartments were analyzed by dividing the number of positive stained nuclei with the number of negatively stained nuclei to give a proportion of cellular population as in (C) above. (F) Also the positively stained nuclei number was divided by the area in pixels to give an estimate of immune cell density. Each data point represents a single patient (median scores of all TMA cores (n=6)). Both methods gave same results.

N represent the number of patients studied.

**Supplementary Figure 4: Immune cell infiltrate in PDAC patients**

Panels depict visual comparison of immune cell infiltrate in stromal compartments ('juxtatumoral' defined as within 100 $\mu$ m of tumor and marked by the red dotted line and the rest of the tumor stroma as 'panstromal') for T-cells (CD3<sup>+</sup>, (A)), helper T-cells (CD4<sup>+</sup> (B)) cytotoxic T cells (CD8<sup>+</sup>, (C)), regulatory T-cells (FoxP3<sup>+</sup>, (D)), B-cells (CD20<sup>+</sup>, (E)), natural killer cells (CD56<sup>+</sup>, (F)), neutrophils (myeloperoxidase<sup>+</sup>, (G)) and macrophages (CD68<sup>+</sup>, (H)). Scale bars: 100 $\mu$ m.

**Supplementary Figure 5: Stromal compartment specific immune cell infiltration in human PDAC for CD3<sup>+</sup> and CD56<sup>+</sup> cells.**

Comparison of immune cell infiltration in the two PDAC stromal compartments was made for CD3<sup>+</sup> (A) and CD56<sup>+</sup> (B) as described in Figure 2 and Supplementary Figure 1-2. Each data point represents a single patient (median scores of all TMA cores (n=6)) and lines represent median for the cohort of patients. PDAC tissues demonstrate a significantly lesser density in the juxtatumoral stroma relative to the panstromal compartment for CD3<sup>+</sup> and CD56<sup>+</sup> cells. Mann Whitney U test; p-values are two-tailed. \*\*\* p< 0.001; \*\* p= 0.001 to 0.01.

**Supplementary Figure 6: Stromal compartment specific immune cell infiltration in an independent cohort of PDAC patients**

Immune cells were stained and analyzed as described in Supplementary Figures 1-4. This cohort was formed predominantly by patients with metastatic disease (TMA B). Therefore, these tissues were obtained from biopsy specimens. There is a defect in infiltration of T-cells (CD3<sup>+</sup> (A)), helper T-cells (CD4<sup>+</sup> (B)) and cytotoxic T cells (CD8<sup>+</sup>, (C)), and B-cells (CD20<sup>+</sup>, (E)). In contrast T regulatory cells (FoxP3<sup>+</sup> (D)) and macrophages (CD68<sup>+</sup> (F)) were not significant, suggesting that these immune cells can access the tumor cells. CD8<sup>+</sup> and CD20<sup>+</sup> findings are consistent with the primary cohort of patients suggesting that the exclusion of these immune cells from the immediate tumor microenvironment is consistent throughout the disease progression.

Mann Whitney U test; p-values are two-tailed. \*\* p= 0.001 to 0.01; \* p= 0.01 to 0.05.

Number of patients analyzed for each marker are indicated by 'n'.

**Supplementary Figure 7: Stromal compartment specific immune cell infiltration in ampullary cancer patients**

Immune cells were stained and analyzed as described in Supplementary Figures 1-4. There was equal infiltrate in the juxtatumoral and pan-stromal compartments of T-cells (CD3<sup>+</sup> (A)), helper T-cells (CD4<sup>+</sup> (B)), cytotoxic T-cells (CD8<sup>+</sup>, (C)) regulatory T-cells (FoxP3<sup>+</sup>, (D)) and B-cells (CD20<sup>+</sup>, (E)) and macrophages (CD68<sup>+</sup>, (F)). Mann Whitney U test; p-values are two-tailed. N.s: not significant.

Number of patients analyzed for each marker are indicated by 'n'.

**Supplementary Figure 8: Stromal compartment specific immune cell infiltration in cholangiocarcinoma patients**

Immune cells were stained and analyzed as described in Supplementary Figures 1-4. There was equal infiltrate in the juxtatumoral and panstromal compartments of T-cells (CD3<sup>+</sup> (A)), helper T-cells (CD4<sup>+</sup> (B)), cytotoxic T cells (CD8<sup>+</sup>, (C)), regulatory T-cells (FoxP3<sup>+</sup>, (D)) and B-cells (CD20<sup>+</sup>, (E)) and macrophages (CD68<sup>+</sup>, (F)).

Mann Whitney U test; p-values are two-tailed. N.s: not significant

Number of patients analyzed for each marker are indicated by 'n'.

**Supplementary Figure 9: Correlation of circulating monocytes with CD68<sup>+</sup> infiltrate in patients with PDAC.**

Correlation plots were constructed for circulating monocytes and the CD68<sup>+</sup> immune cell infiltrate in whole tumor-stroma (A) and in distinct stromal compartments: juxtatumoral compartment (B) and panstromal compartment (C) in the PDAC patients. There was no correlation between these counts. Each data point represents one unique patient and the correlation line was plotted as shown with the values representing Pearson's Correlation Coefficient 'r' and the respective p-value.

**Supplementary Figure 10: Correlation of circulating lymphocytes with CD3<sup>+</sup> infiltrate in patients with PDAC.**

Correlation plots were constructed for circulating lymphocytes and the CD3<sup>+</sup> immune cell infiltrate in whole tumor-stroma (A) and in distinct stromal compartments: juxtatumoral compartment (B) and panstromal compartment (C) in the PDAC patients. There was no correlation between these counts. Each data point represents one unique patient and the correlation line was plotted as shown with the values representing Pearson's Correlation Coefficient 'r' and the respective p-value.



**Supplementary Figure 11: Correlation of circulating neutrophils with Myeloperoxidase<sup>+</sup> immune cell infiltrate in patients with PDAC.**

Correlation plots were constructed for circulating neutrophils and the Myeloperoxidase<sup>+</sup> immune cell infiltrate in whole tumor-stroma (A) and in distinct stromal compartments: juxtatumoral compartment (B) and panstromal compartment (C) in the PDAC patients. There was no correlation between these counts. Each data point represents one unique patient and the correlation line was plotted as shown with the values representing Pearson's Correlation Coefficient 'r' and the respective p-value.

**Supplementary Figure 12: Stromal compartment specific immune cell infiltration in KPC mice treated by vehicle or ATRA.**

KPC mice were treated by ATRA or vehicle as earlier described and immunohistochemistry performed for the immune cell markers CD4<sup>+</sup> helper T-cells (A), CD45R<sup>+</sup> B-cells (B), F4/80<sup>+</sup> macrophages (C) and CD11b<sup>+</sup> MDSC (D) (quantification for juxtatumoral and panstromal compartments are shown in Figure 4). Juxtatumoral exclusion of Cd45R<sup>+</sup> B-cells can be seen in (B). There are no changes in immune cell density for these cells after treatment by ATRA (A-D).

**Supplementary Figure 13: Analysis of migration of T-cells**

One, four and eight hour durations for migration of T-cells were investigated in order to determine optimal duration required for migration assays. All assays were done in three technical repeats. Various methods for analysis were employed. (A) Absolute CD3<sup>+</sup> T-cell numbers that migrated to bottom of Transwell after one, four and eight hours. There was no significance after one hour, however significant differences were observed between activated PSC and quiescent as well as 0% RPMI (without FBS), which served as background, after four and eight hours. (B) Proportion of migrated cells; migrated CD3<sup>+</sup> T-cells at the bottom of each well were divided by the total number of cells inserted at beginning of assay. Results are identical to “A” which shows significant differences after four and eight hours.

(C) CD3<sup>+</sup> T-cell migration was performed for duration of four hours. RPMI 0% and 10% (FBS) served as background (negative) and positive controls respectively. CD3<sup>+</sup> T-cell significantly migrated to RPMI 10% over RPMI 0% and preferentially to activated PSC over 0% and 10% RPMIs. (D) Background migration (RPMI 0%) cell count was deducted from all assay readouts as in “C” to give relative migration; activated PSC remained significant over RPMI 10%. (E) Normalization of “D” to basal migration (RPMI 10%) gave identical results to “D” but allowed comparison across biological repeats carried out from T-cells from different healthy and diseased donors. All data in figures 5 and 7 are presented as amalgamation of these biological repeats from a number of patients/donors.

\*\*\*  $p < 0.001$ . Paired T-test or ANOVA as appropriate.

**Supplementary Figure 14: Heatmap of gene expression changes after treatment of**

**PSC with ATRA.** (A) Heatmap of gene expression changes for significantly differentially expressed genes involved in cell adhesion (GO:0007155, gene set enrichment test adjusted  $p = 0.06$ ), derived from the ATRA – control time course experiment. Hierarchy clustering of samples from 10 groups, ATRA 30 minutes, 4 hours, 12 hours, 24 hours and 168 hours, as well as control 30 minutes, 4 hours, 12 hours, 24 hours and 168 hours, was performed based on the expression profiles of these differentially expressed genes using the Euclidean metric. (B) Heatmap of gene expression changes for significantly differentially expressed genes involved in cytokine-cytokine receptor interaction (KEGG pathway, adjusted  $p = 0.23$ ), derived from the qPSC versus aPSC experiment. Hierarchy clustering of samples from 4 groups, control (black), matrigel 1  $\mu\text{m}$  (blue), plastic 1  $\mu\text{m}$  (burlywood) and plastic 10  $\mu\text{m}$  (dark brown), based on these gene expression profiles was performed. (C) Heatmap of gene expressed changes for significantly differentially expressed genes involved in cytokine-cytokine receptor interaction (adjusted  $p = 0.04$ ), derived from the ATRA – control time course experiment.

**Supplementary Figure 15: Circulating effector T-cells in human PDAC**

Effector subsets of circulating CD4<sup>+</sup> (A) and CD8<sup>+</sup> (B) T-cells were quantified by flow cytometry in age- and sex-matched 25 un-diseased donors and 8 PDAC patients. There were no differences in the effector subsets of circulating CD4<sup>+</sup> and CD8<sup>+</sup> T-cells between donors and PDAC patients. Mann Whitney U-Test; p values are two-tailed.

(C) Representative histogram showing fluorescent intensity of CXCR4 expression in CD8<sup>+</sup> T-cell of a PDAC patient relative to isotype control.

Mann Whitney U-Test; p values are two-tailed.

**Supplementary Figure 16: CD4<sup>+</sup> effector and memory subsets in human PDAC**

Representative flow cytometry analysis of CD4<sup>+</sup> T-cell subsets on un-diseased donor PBMCs and PDAC patient PBMC). Viable lymphocytes were gated and selected for CD4<sup>+</sup> T-cell (not shown) and were divided into the four subsets using CD45RA and CCR7.

(A) Un-diseased donor CD4<sup>+</sup> T-cell divided into naïve, CM (central memory), EM (effector memory) and TEMRA (terminally differentiated effector memory). There are few TEMRA cells.

(B) CD4<sup>+</sup> T-cell of a human PDAC patient was divided into naïve, CM, EM and TEMRA. TEMRA cells are few and the distribution of subsets is similar to un-diseased donor CD4<sup>+</sup> T-cells

(C) CD4<sup>+</sup> T-cell of a human PDAC patient with bacterial infection. Distribution of T-cell subsets differ from figures A and B with an increase in TEMRA cells observable.

**Supplementary Figure 17: CD4<sup>+</sup> helper T-cell migration from PDAC patients.**

(A) CD4<sup>+</sup> T-cells were measured for CXCR4 expression in age-matched normal donors (n= 6) and PDAC patients (n= 5) using flow cytometry. CXCR4 expression was significantly upregulated in PDAC patients compared to normal donors. Unpaired T-test. \*\* p= 0.001 to 0.01.

(B) CD4<sup>+</sup> T-cells isolated from PDAC patients were used in migration assays as described earlier. CD4<sup>+</sup> T-cells preferentially migrated to activated PSC over quiescent and to recombinant CXCL12 (positive control) over RPMI 10%. \*\*\* p< 0.001; \*\* p= 0.001 to 0.01; \* p= 0.01 to 0.05. Comparisons were conducted with ANOVA with comparisons between columns using Bonferroni's Multiple Comparison Test.

Normal

PDAC

Cholangiocarcinoma

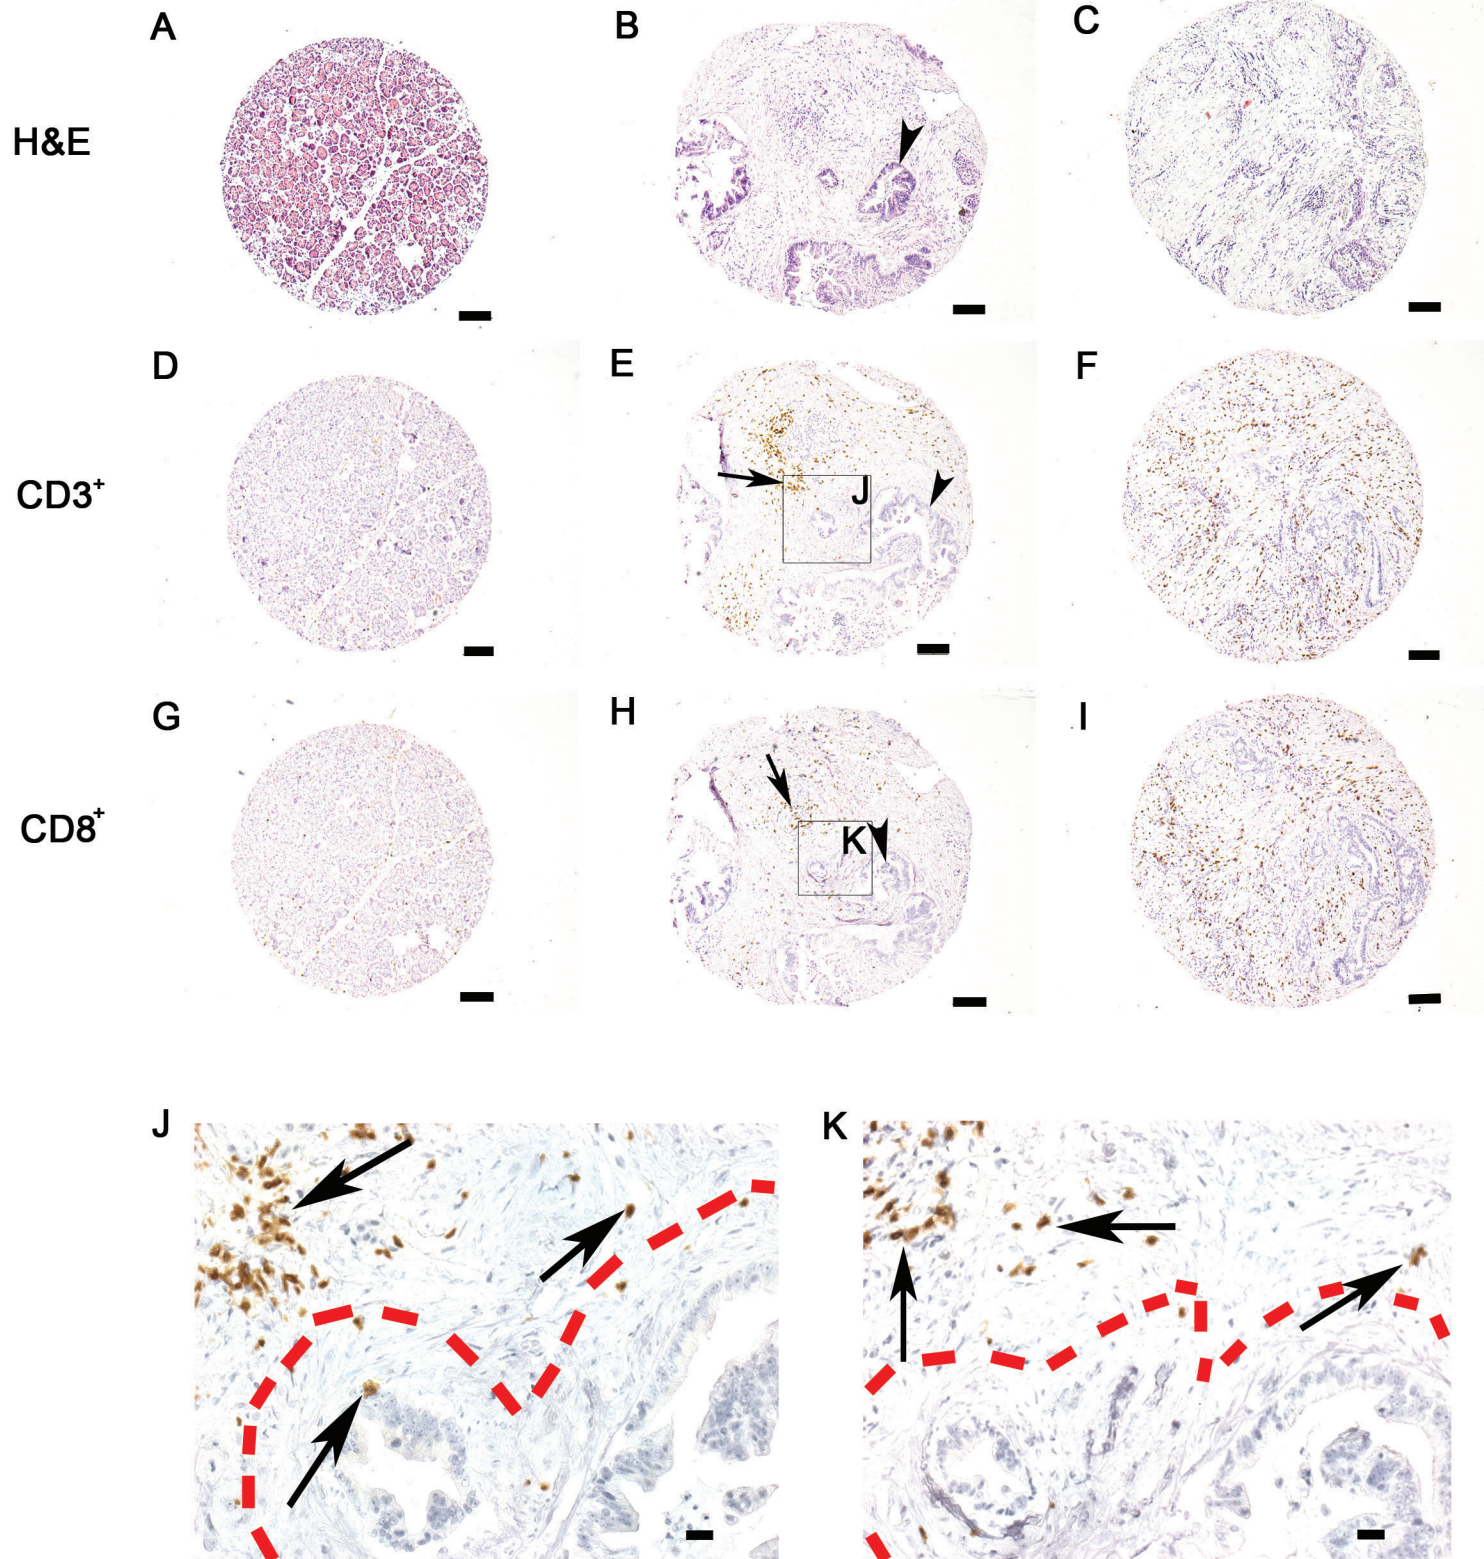



CD8  $\alpha$ -SMA

Supplementary Figure 2

CK  $\alpha$ -SMA

A

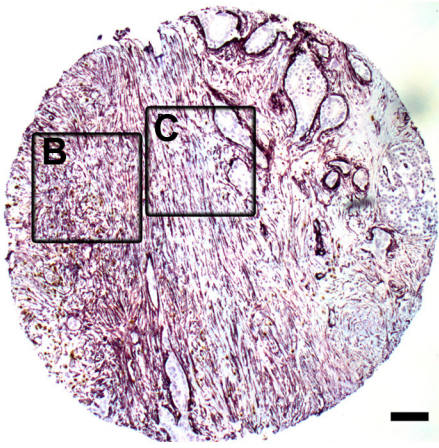

E

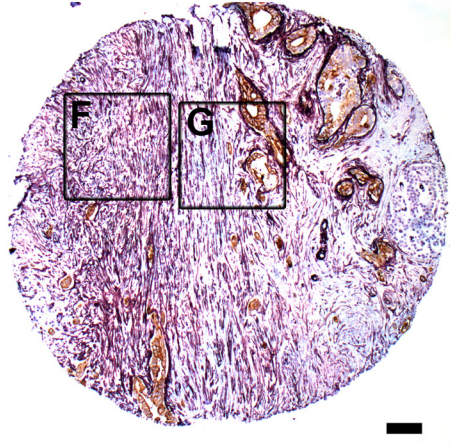

B

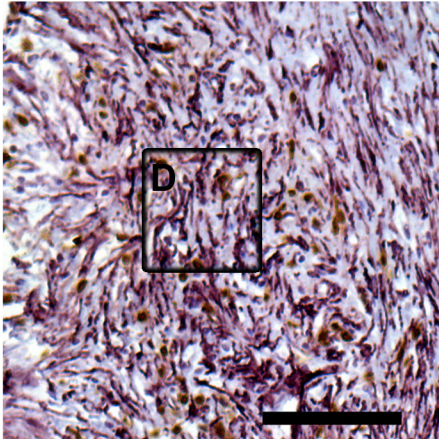

F

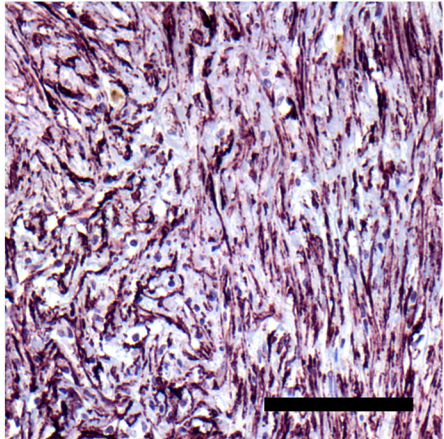

C

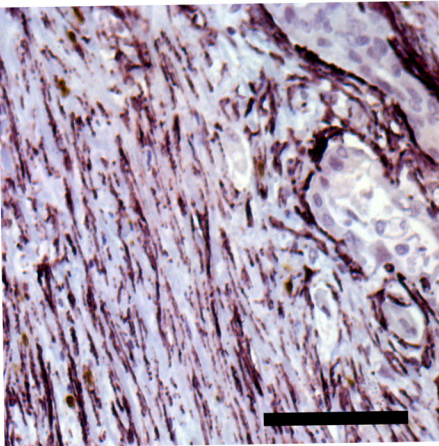

G

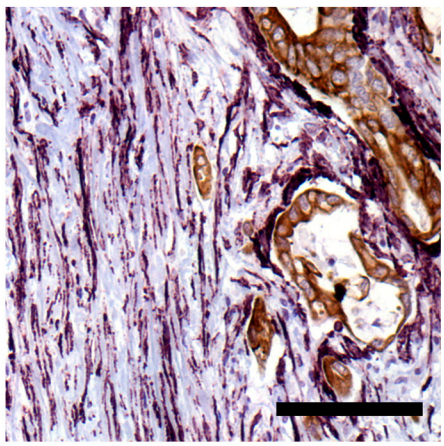

D

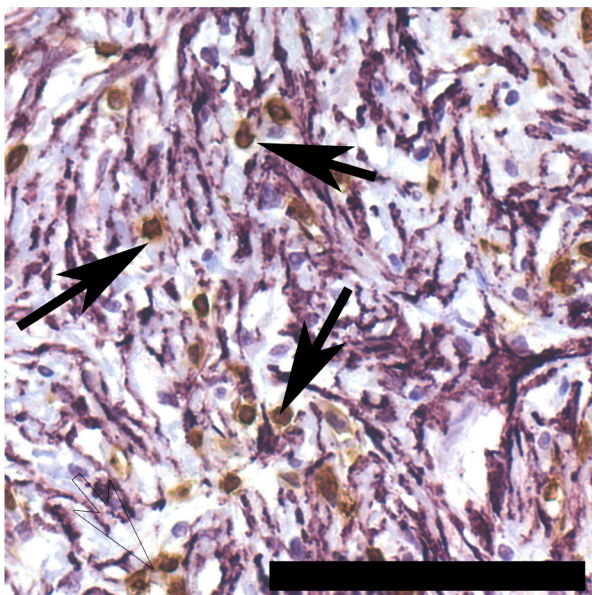

# Supplementary Figure 3

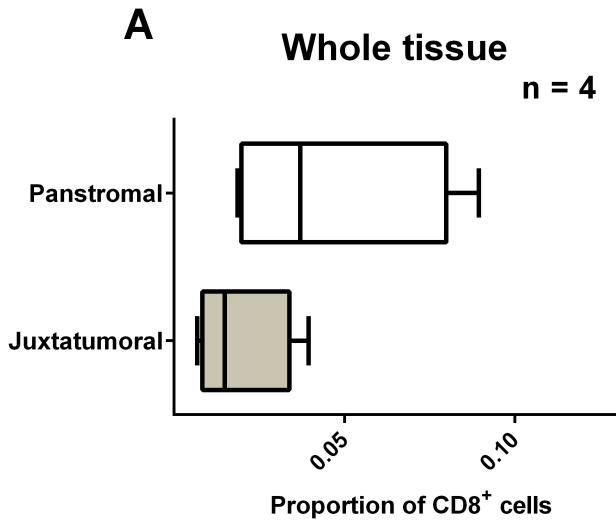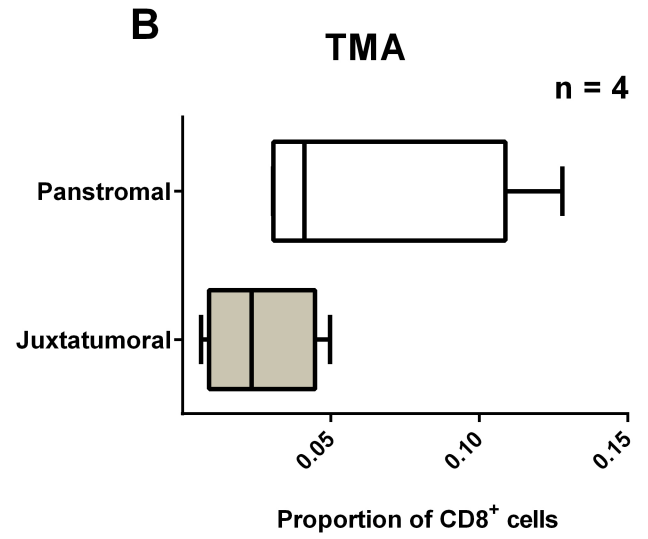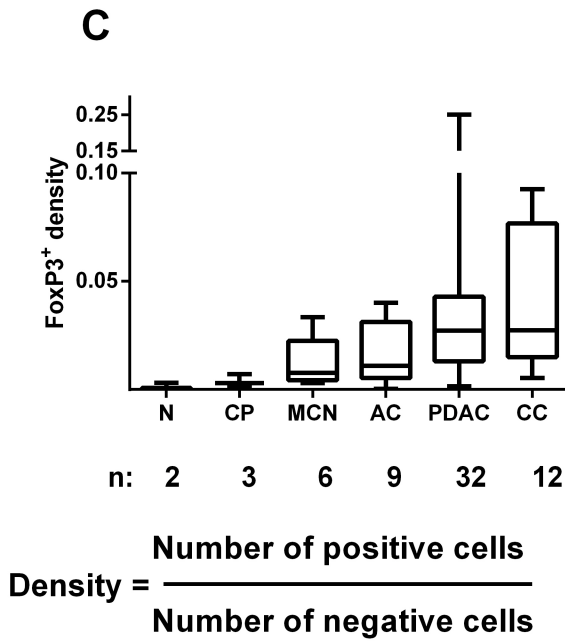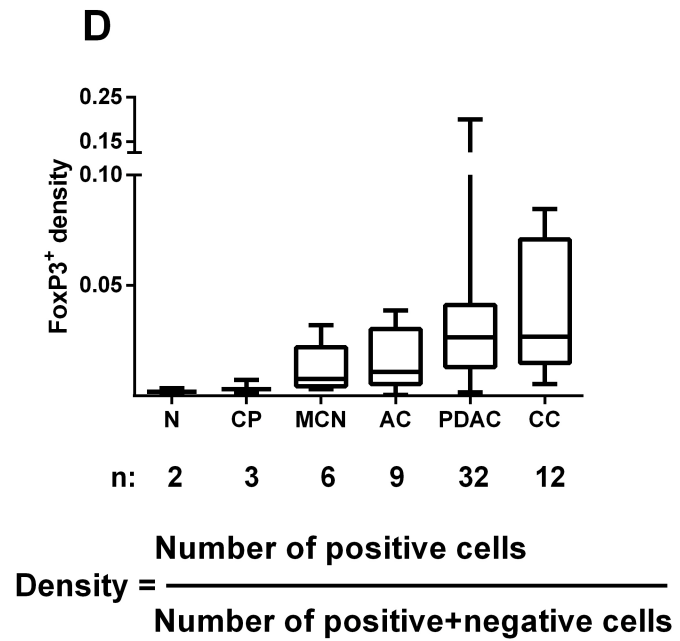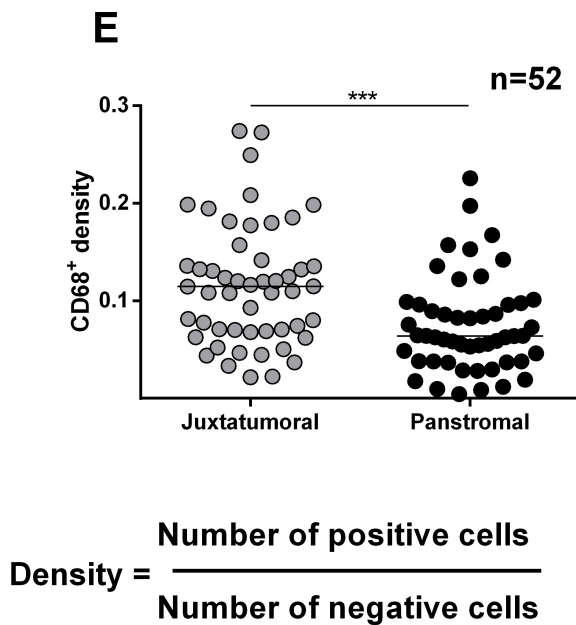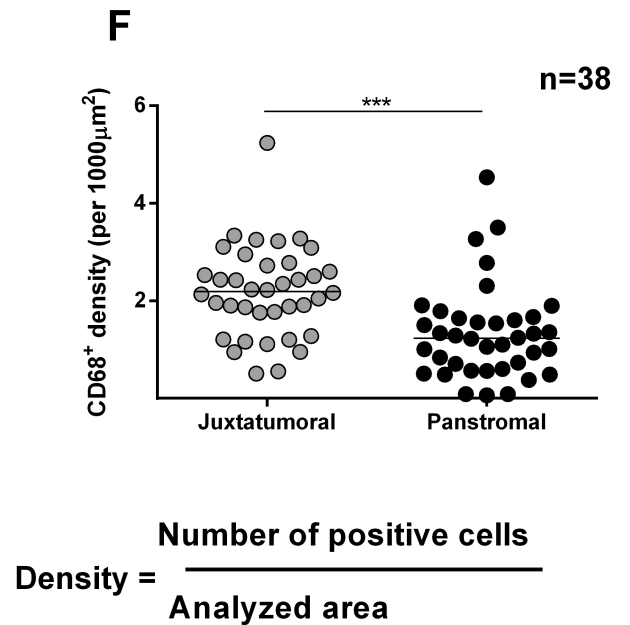

**Supplementary Figure 4**

**A CD3<sup>+</sup>**

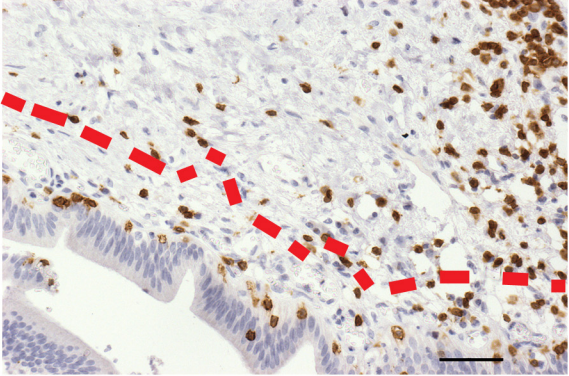

**B CD4<sup>+</sup>**

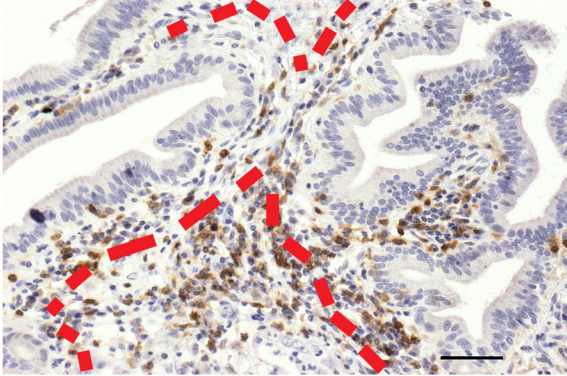

**C CD8<sup>+</sup>**

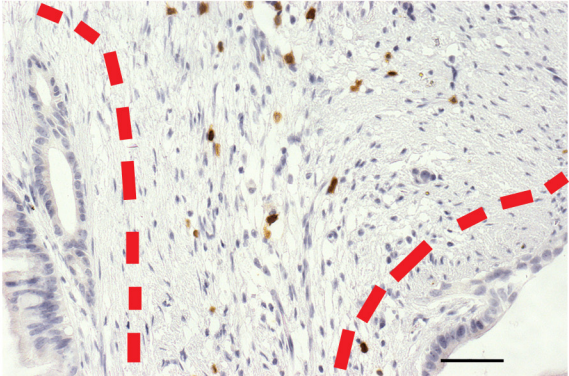

**D FoxP3<sup>+</sup>**

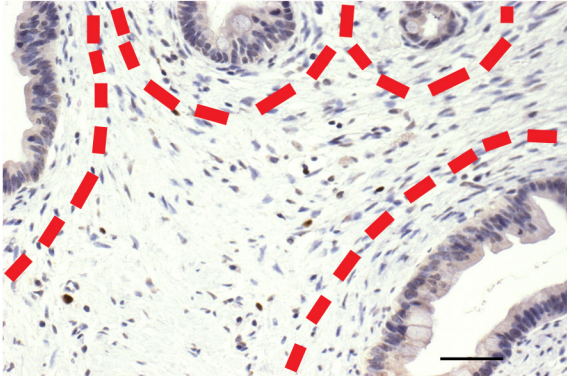

**E CD20<sup>+</sup>**

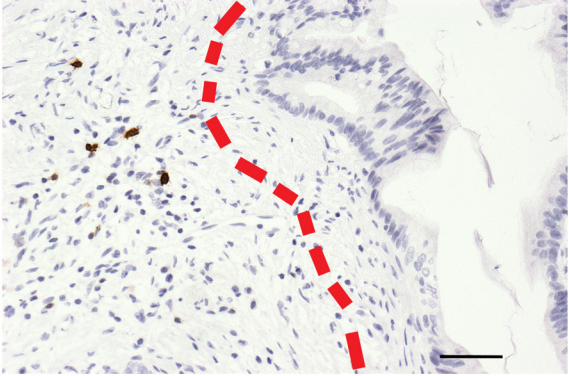

**F CD56<sup>+</sup>**

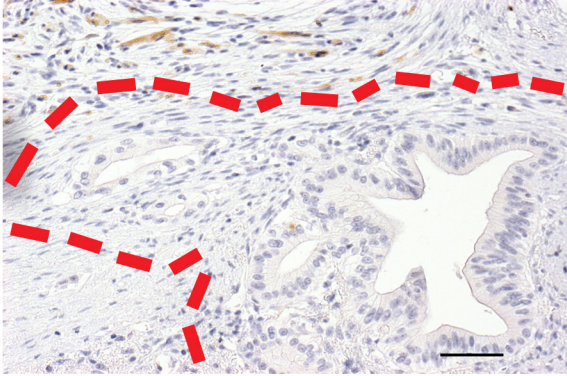

**G CD68<sup>+</sup>**

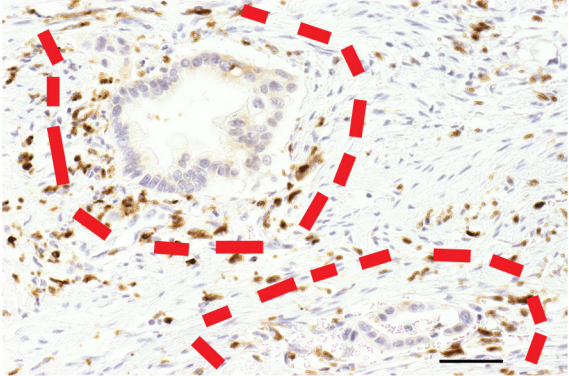

**H Myeloperoxidase<sup>+</sup>**

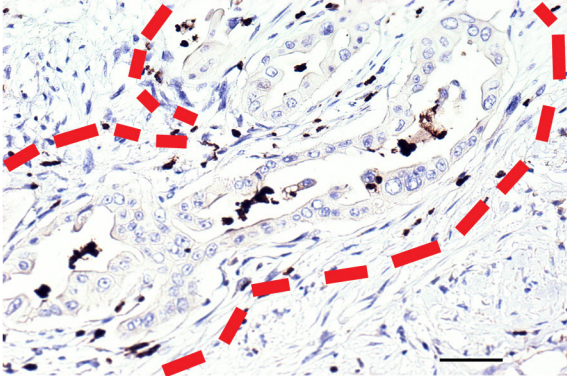

Supplementary Figure 5

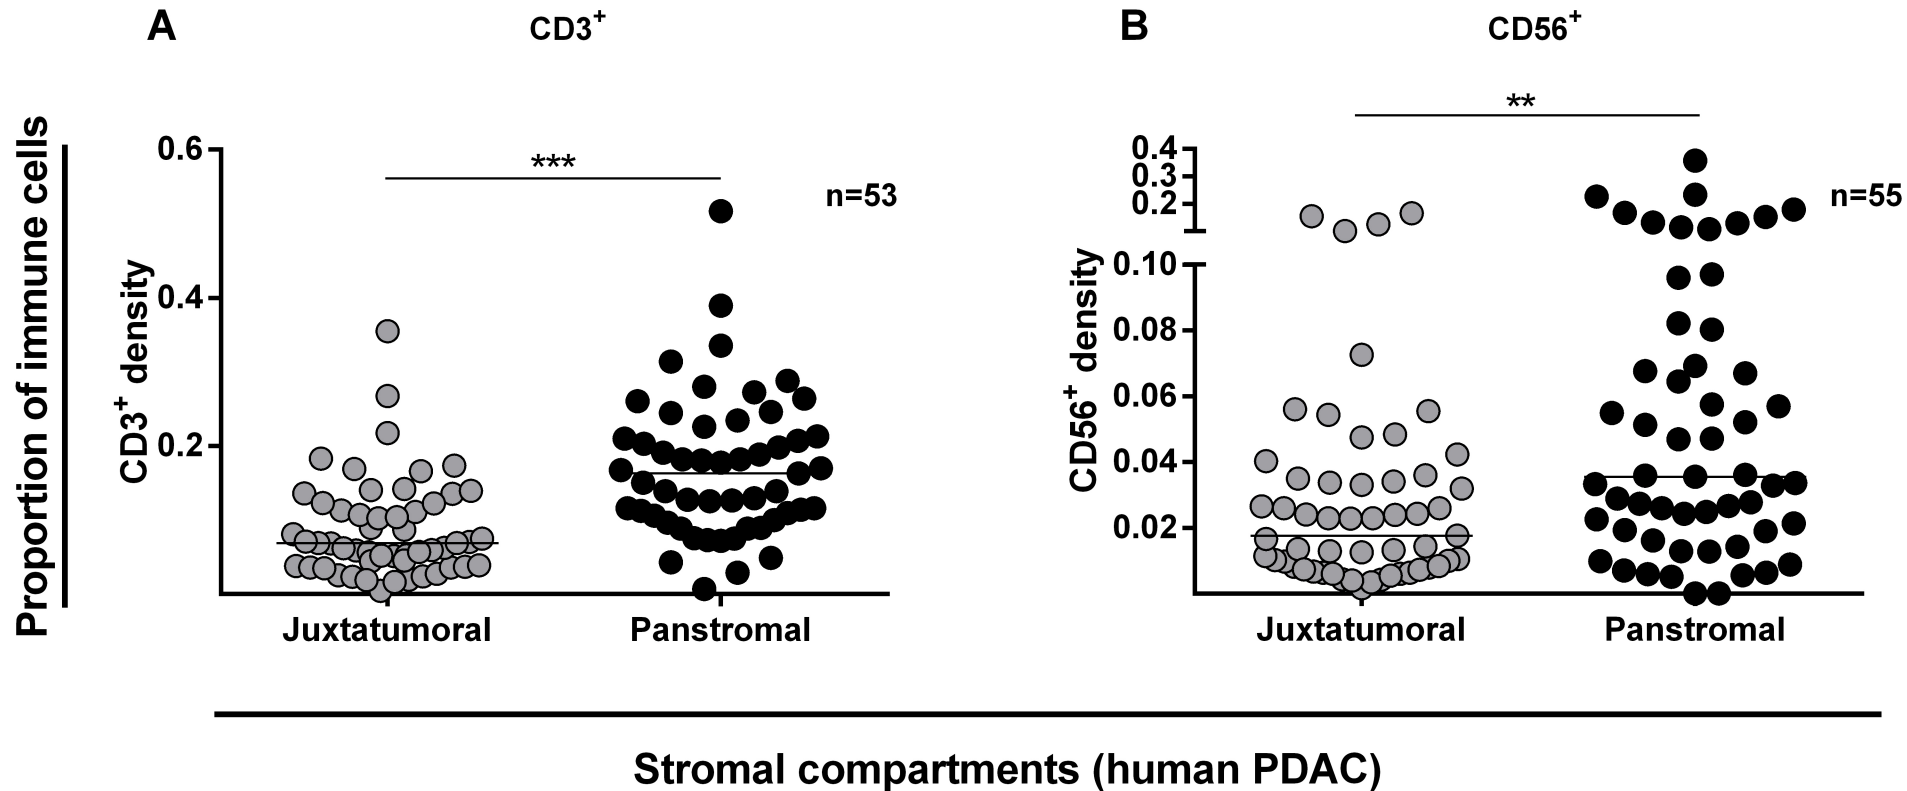

# Supplementary Figure 6

Proportion of immune cells

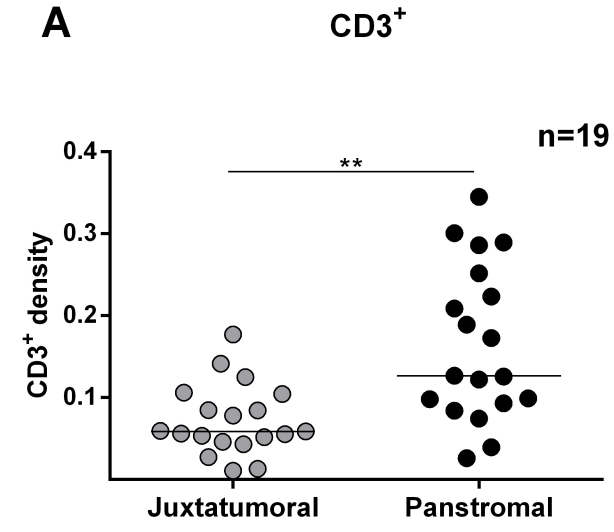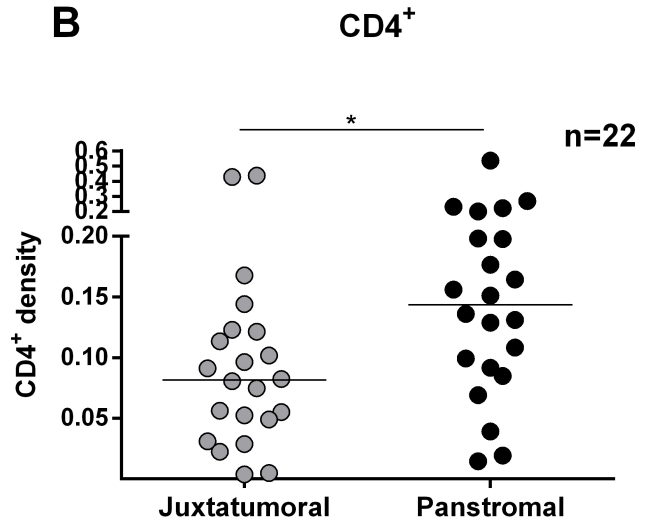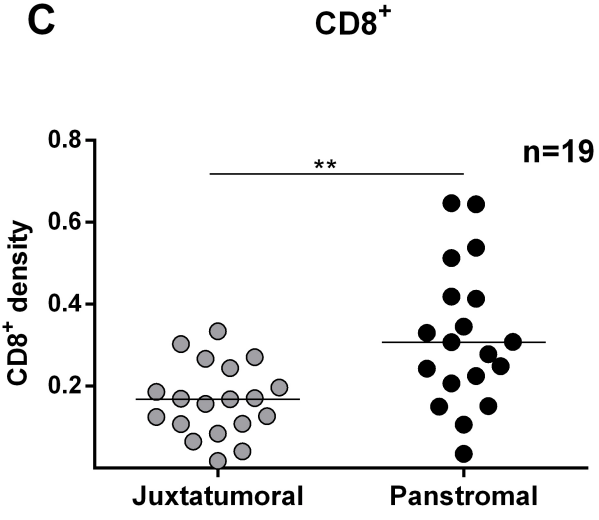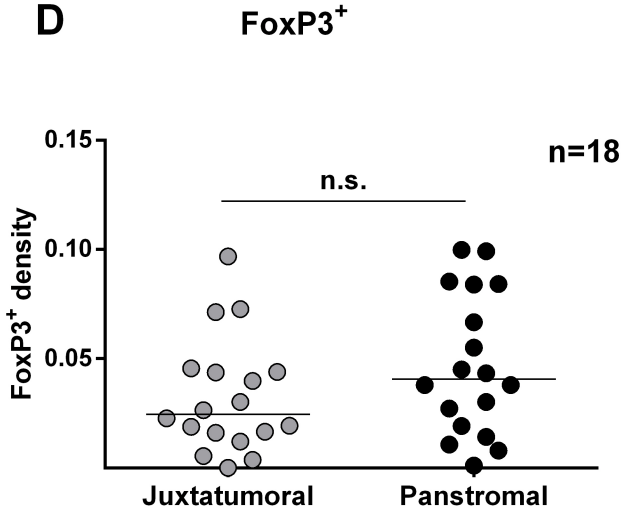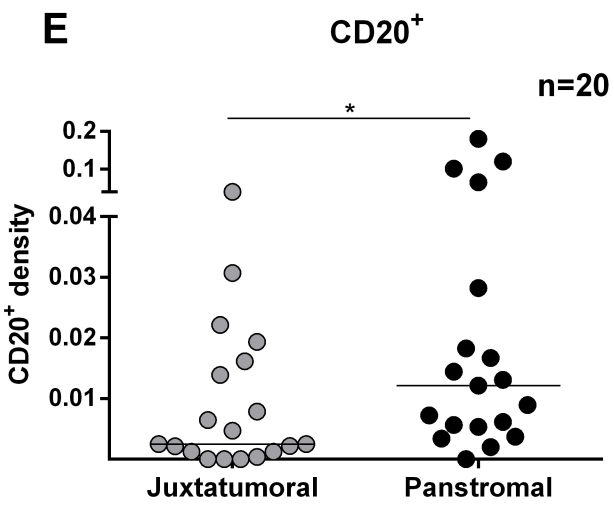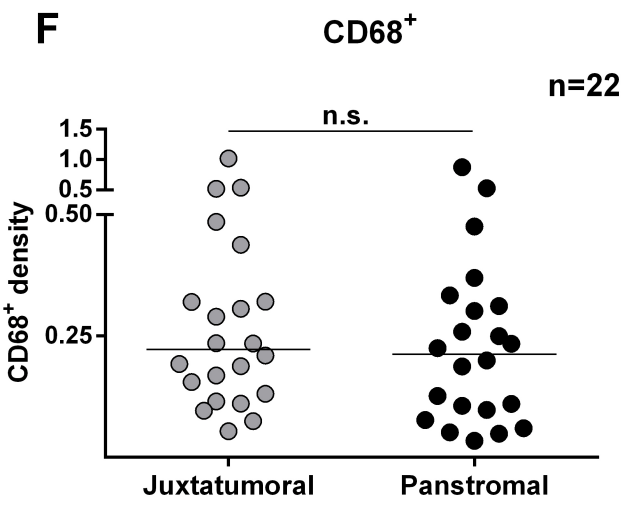

Stromal compartments  
(advanced human PDAC)

# Supplementary Figure 7

Proportion of immune cells

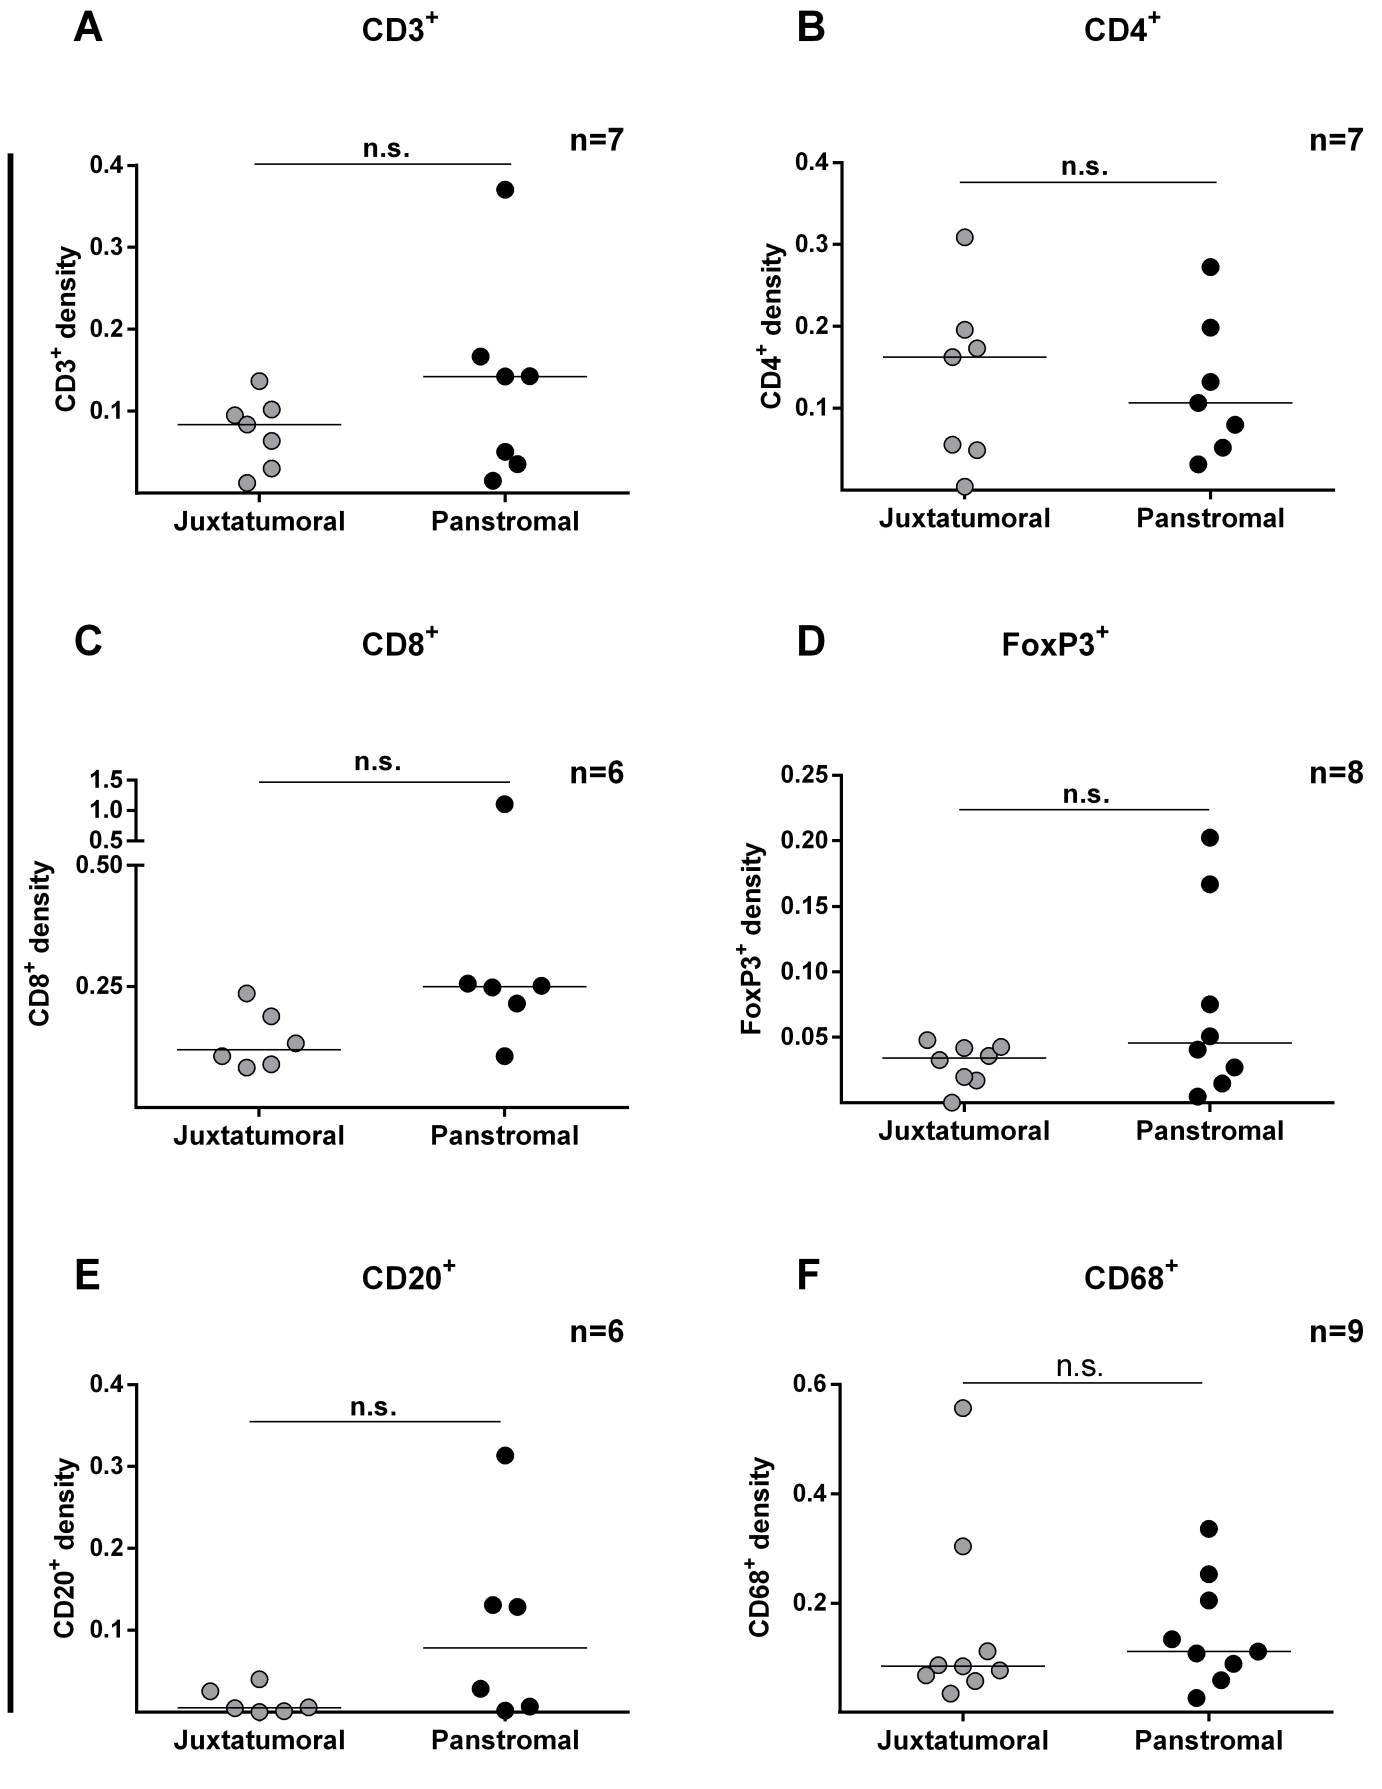

Stromal compartments  
(human ampullary carcinoma)

# Supplementary Figure 8

Proportion of immune cells

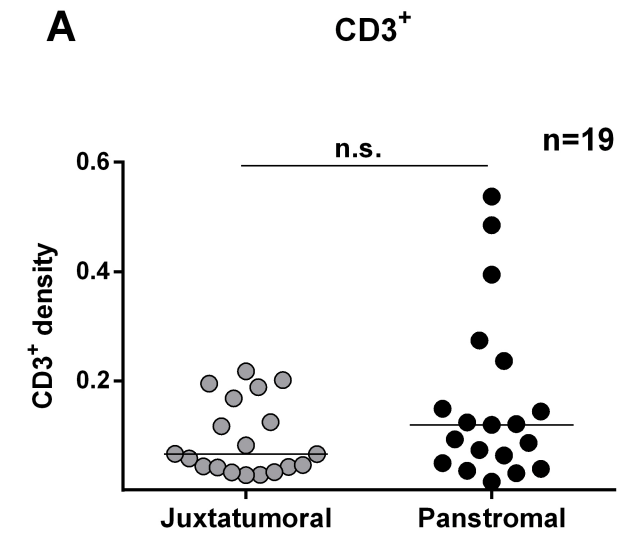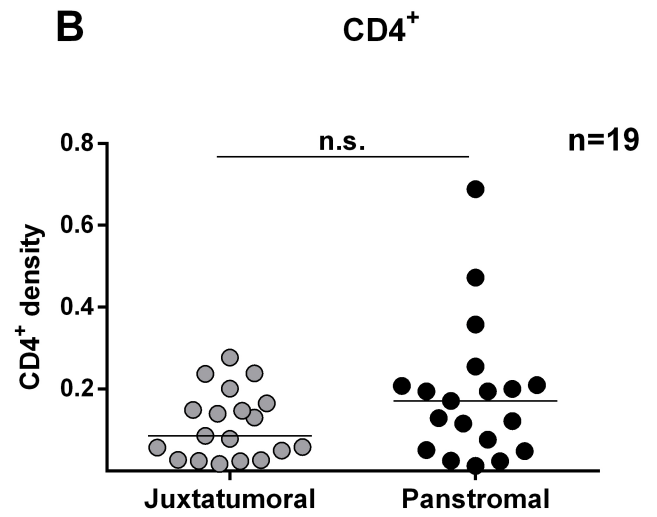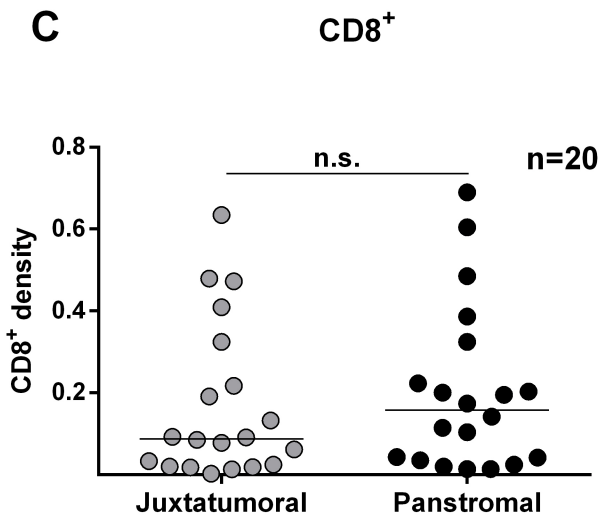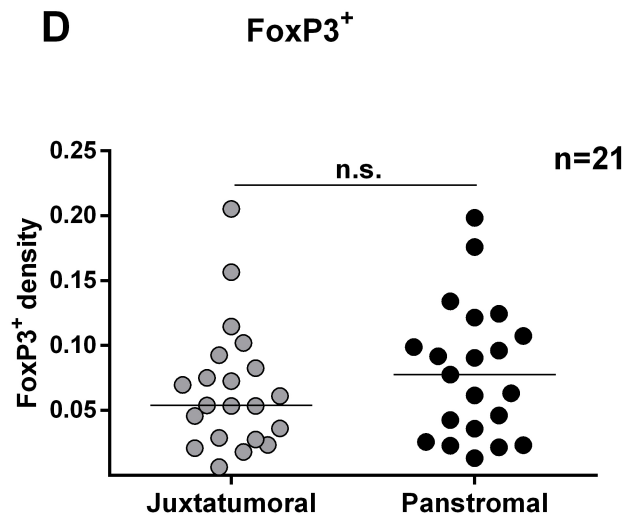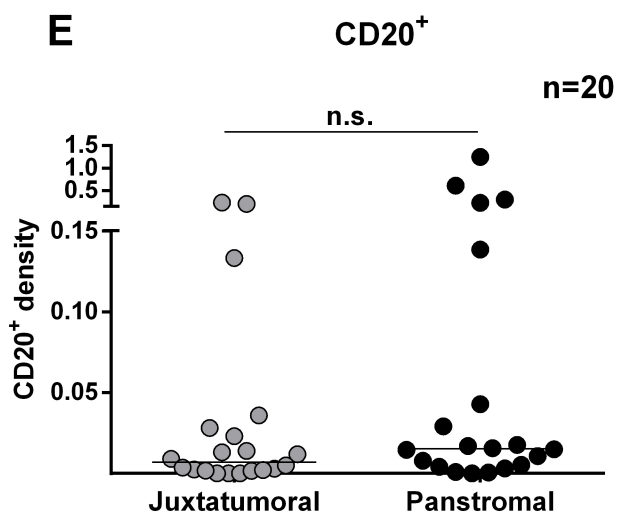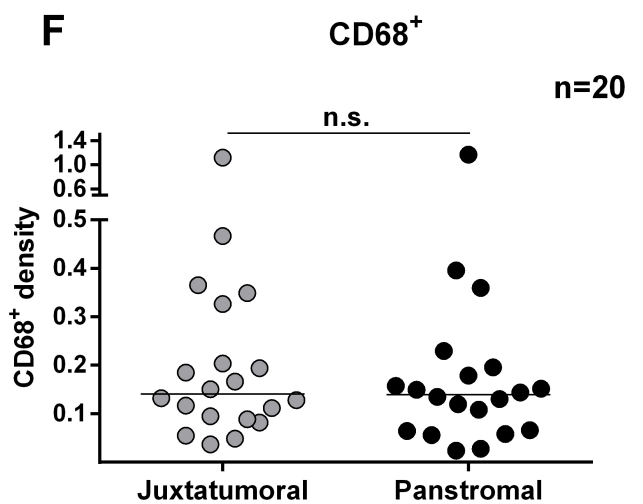

Stromal compartments  
(human cholangiocarcinoma)

Supplementary Figure 9

**A**

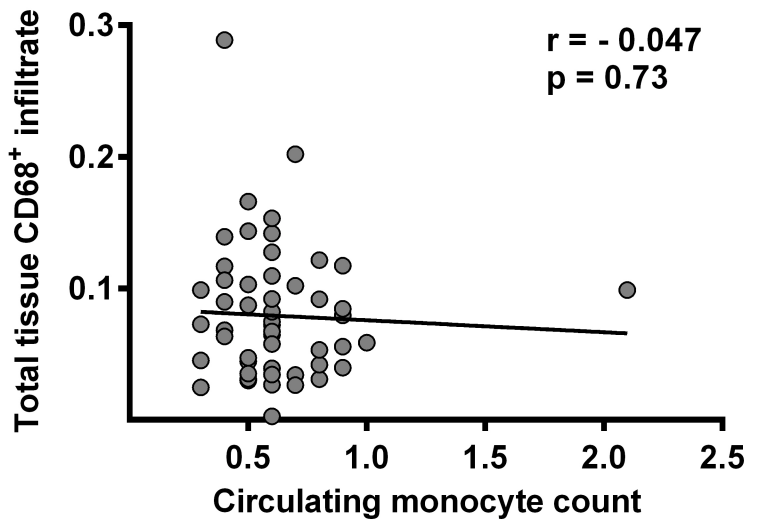



Supplementary Figure 10

**A**

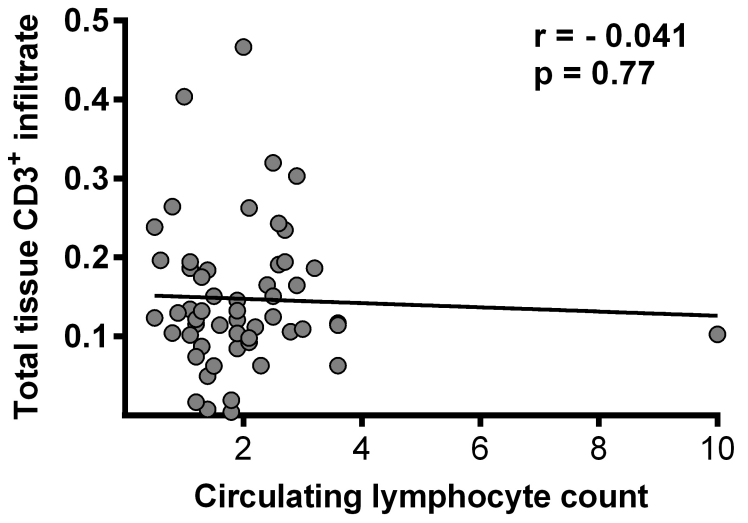

**B**

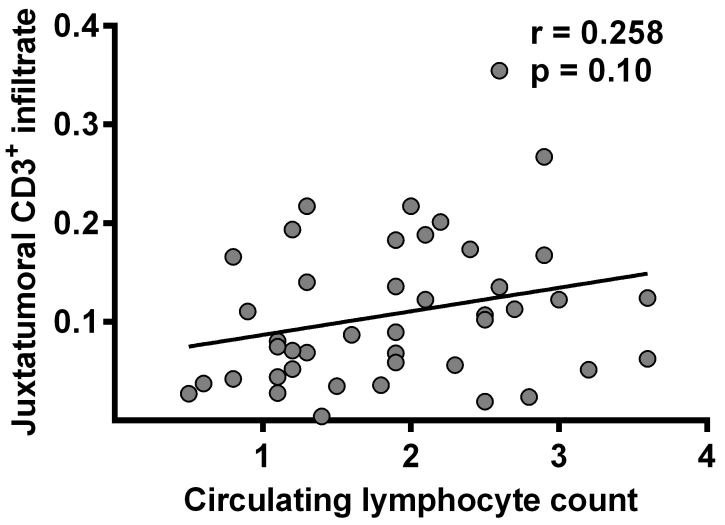

**C**

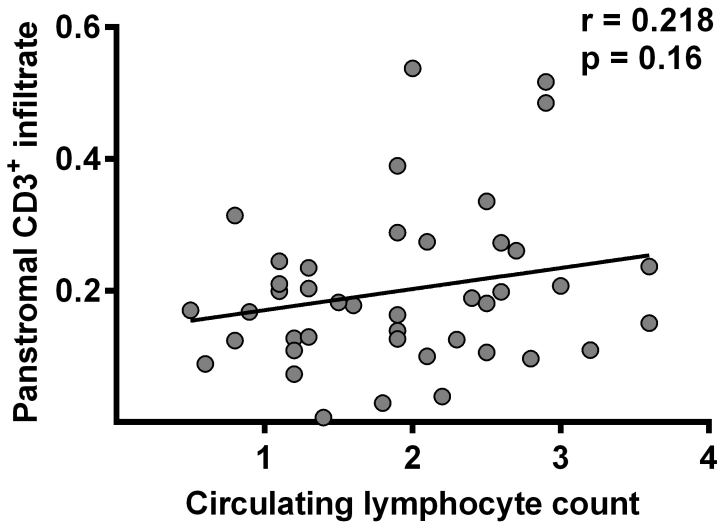

# Supplementary Figure 11

## A

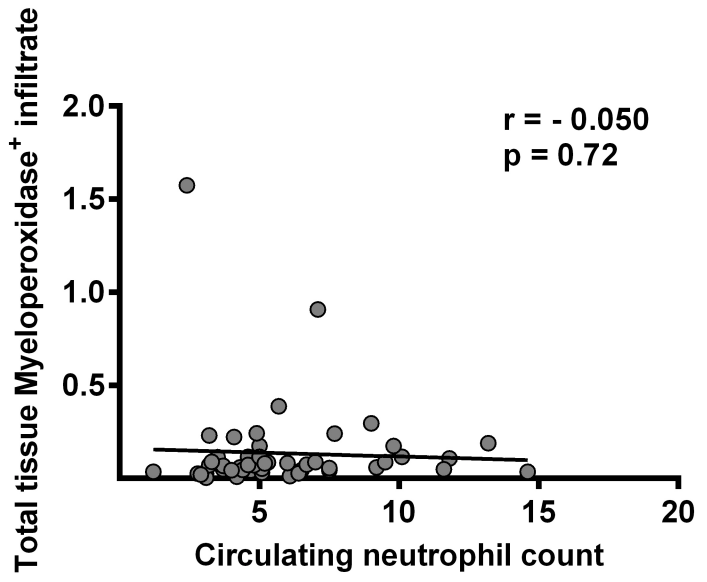

## B

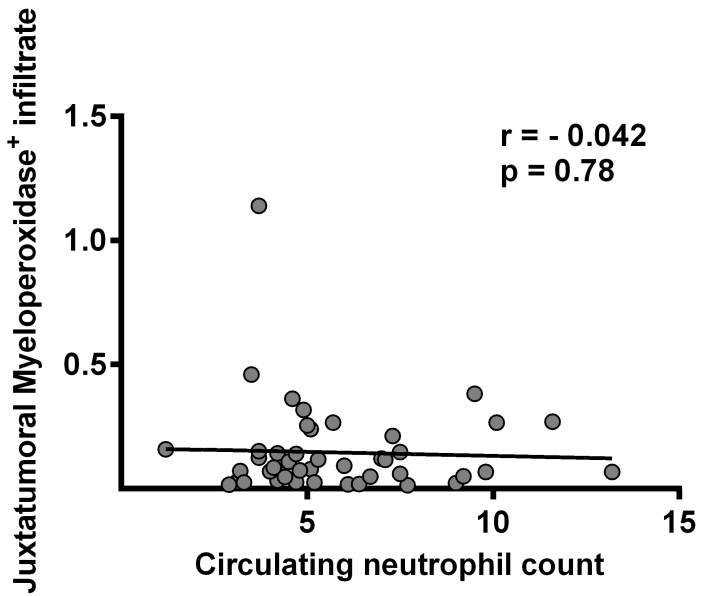

## C

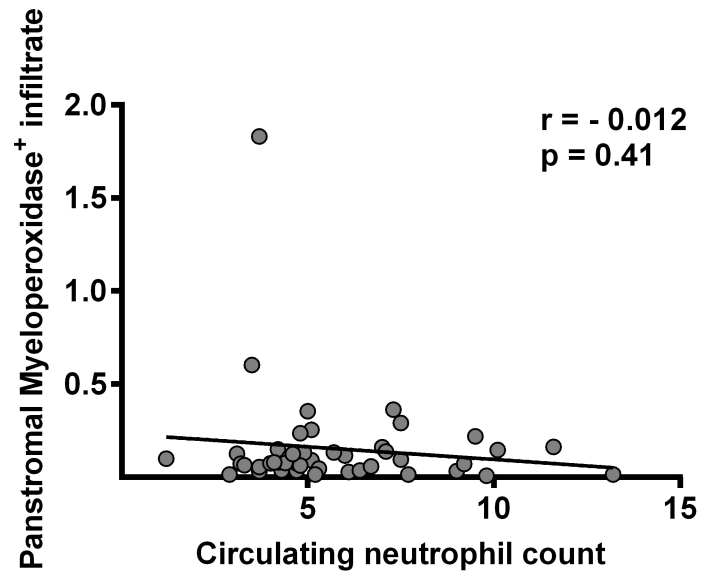

Supplementary figure 12

**A**

**Vehicle**

**ATRA**

**CD4<sup>+</sup>**

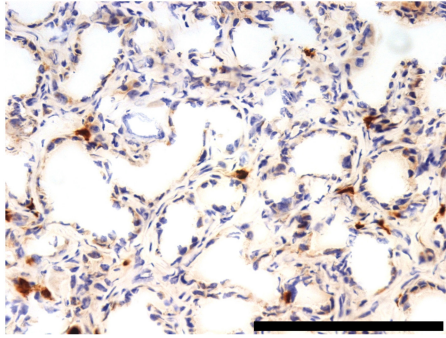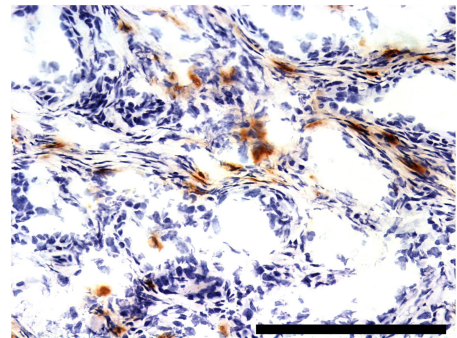

**B**

**CD45R<sup>+</sup>**

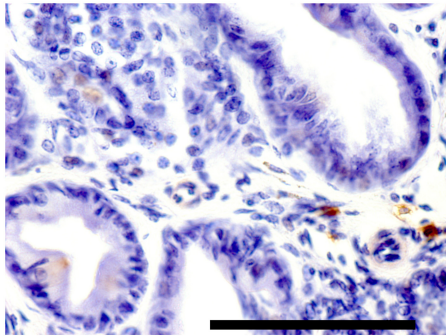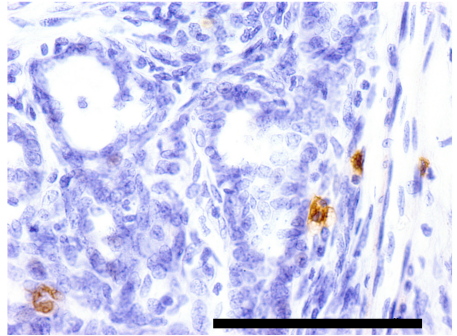

**C**

**F4/80<sup>+</sup>**

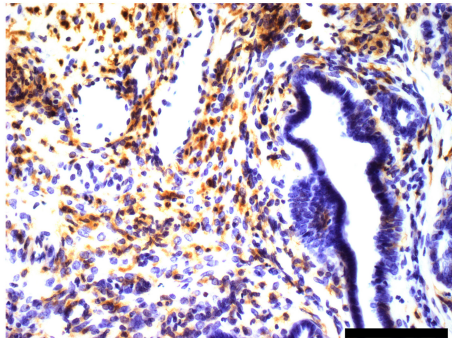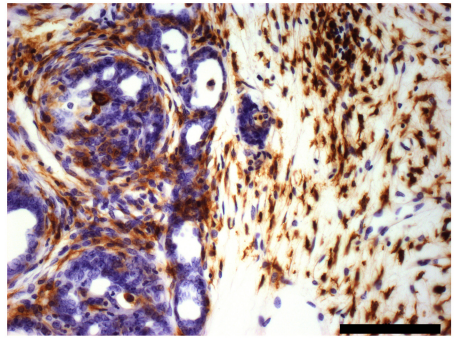

**D**

**CD11b<sup>+</sup>**

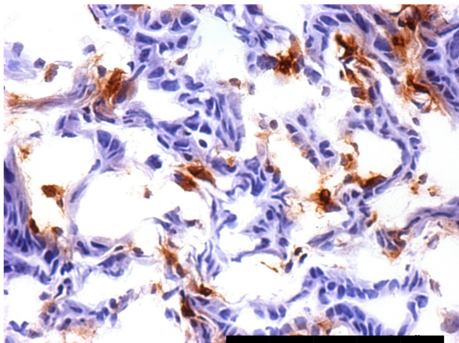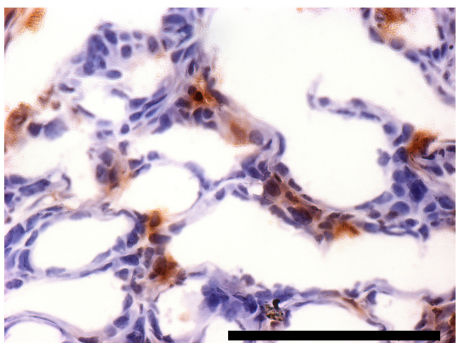

# Supplementary Figure 13

## A Absolute migrated cell numbers

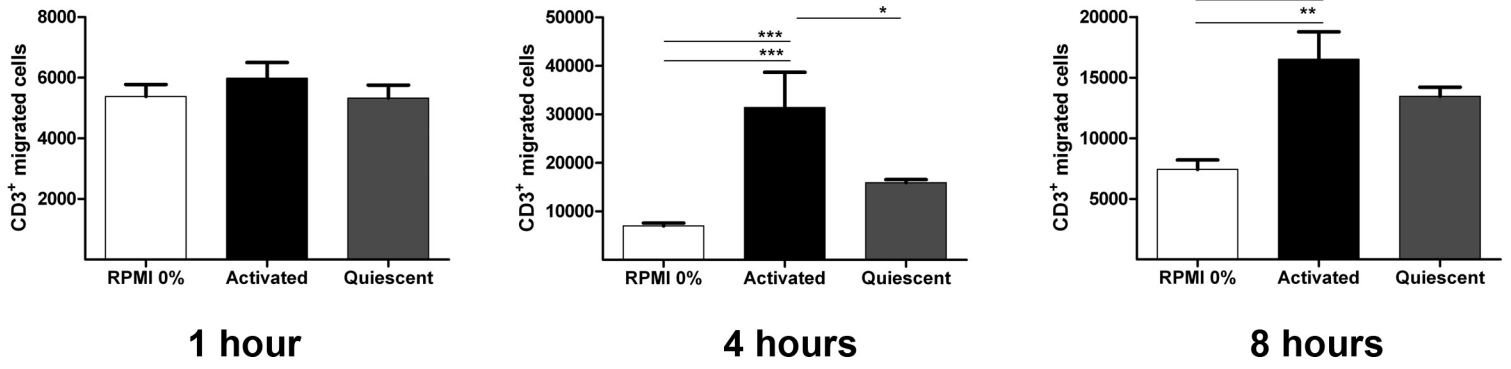

## B Proportion of migrated cells

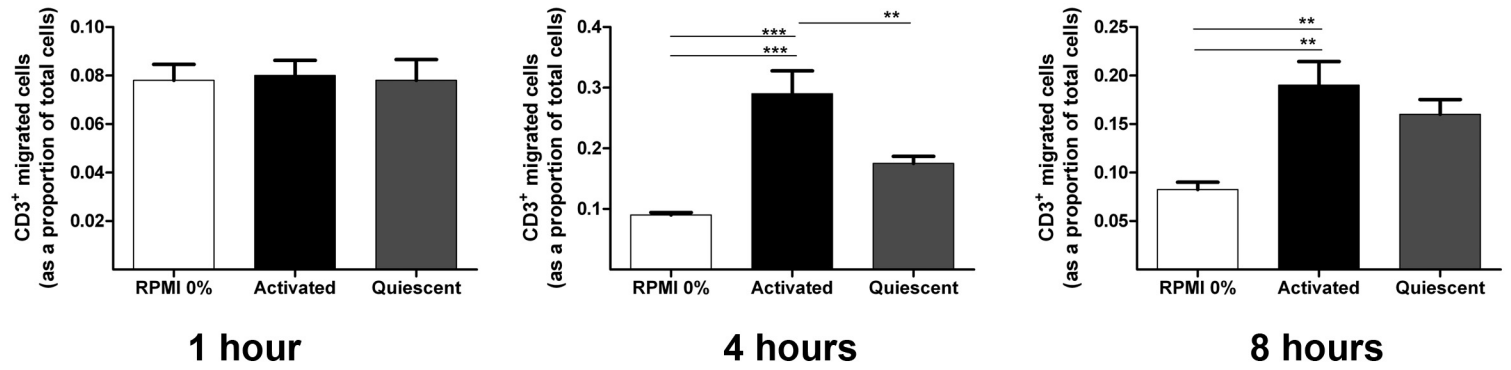

## C Absolute migrated cells

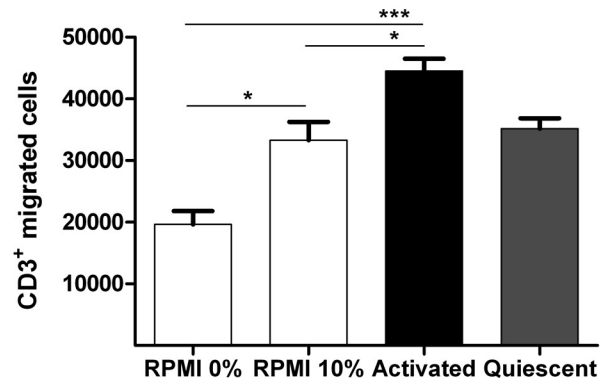

## D Migrated cell number after adjustment for background migration

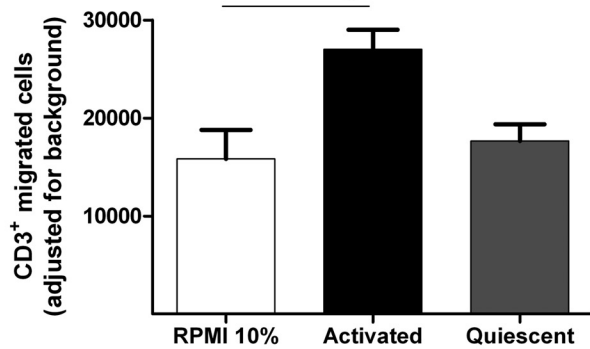

## E Normalised migration

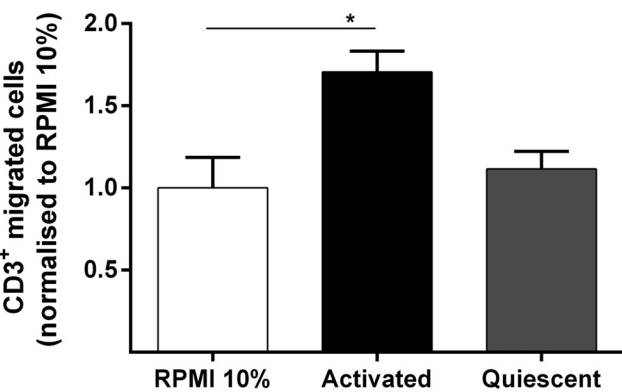

# Supplementary Figure 14

## A

### Cell adhesion (Gene ontology: 0007155)

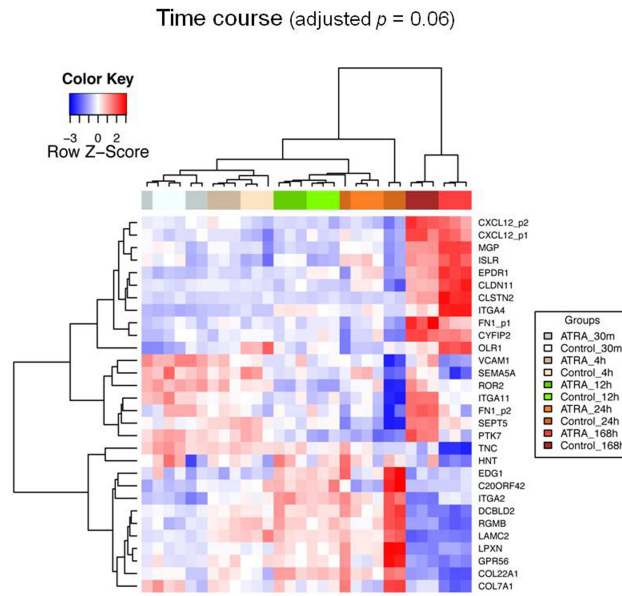

## B

### Cytokine-cytokine receptor interaction (KEGG pathway)

Dosage (adjusted  $p = 0.23$ )

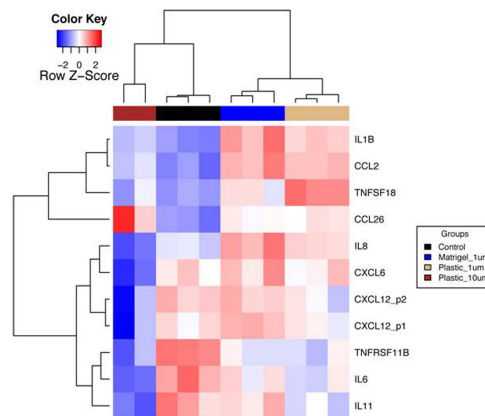

## C

### Cytokine-cytokine receptor interaction (KEGG pathway)

Time course (adjusted  $p = 0.04$ )

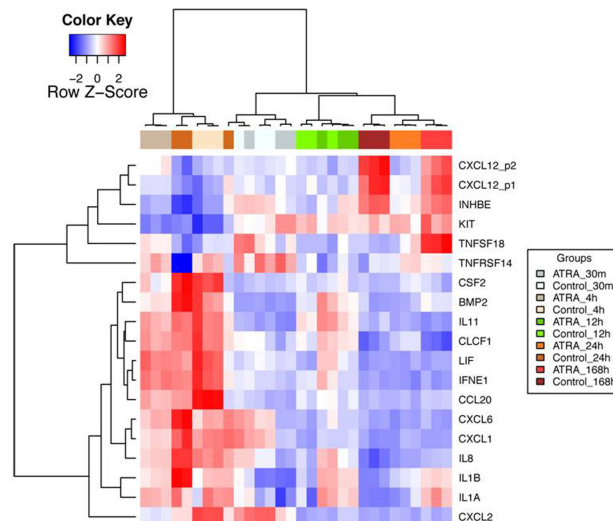

**A** CD4+ Effector cell proportion

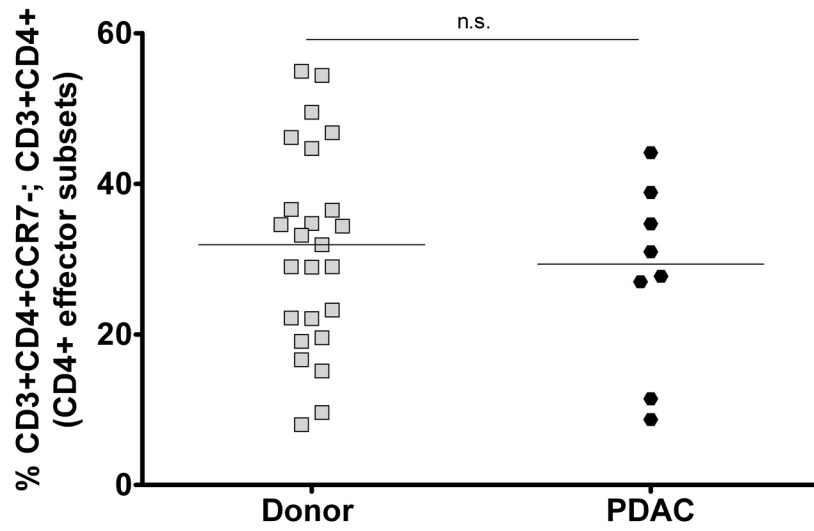

**B** CD8+ Effector cell proportion

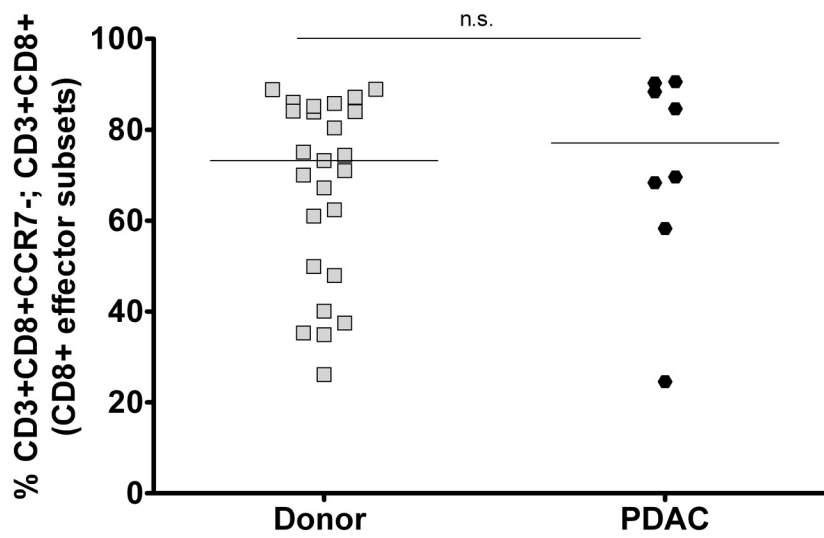

**C** Fluorescent intensity for CXCR4

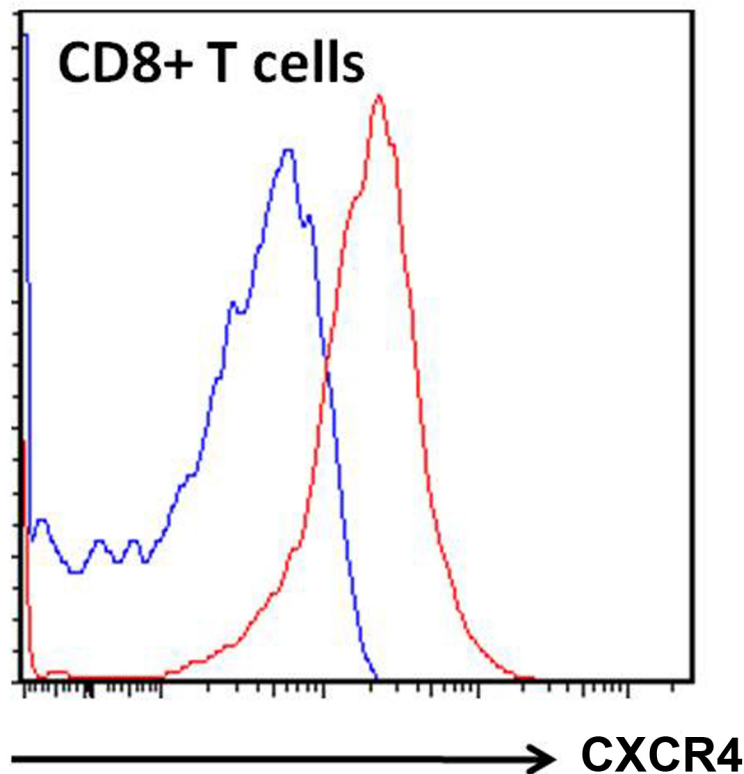

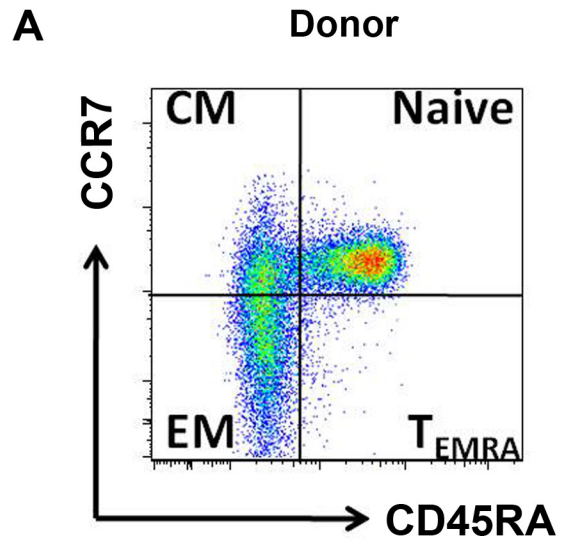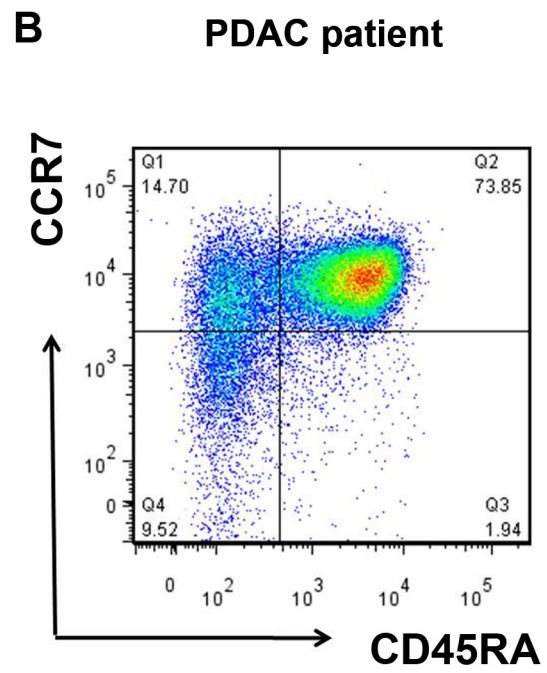

**C PDAC patient (bacterial infection)**

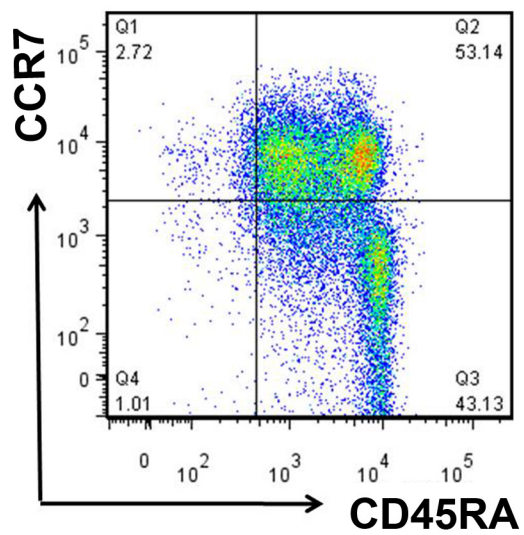

**A Patient CD4+ CXCR4 expression**

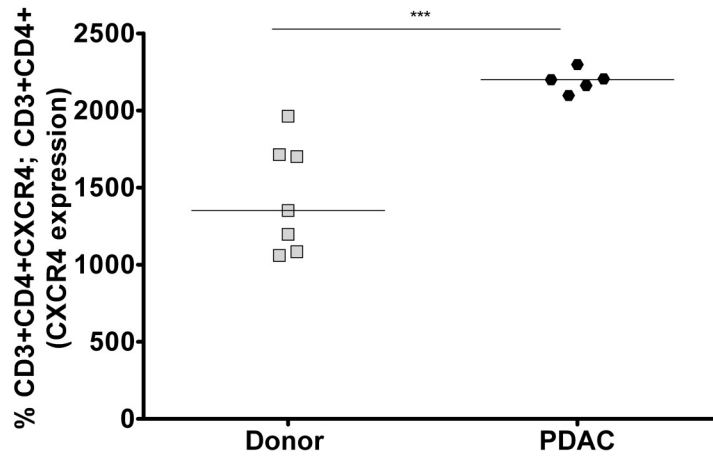

**B PDAC patient CD4+ T-cell**

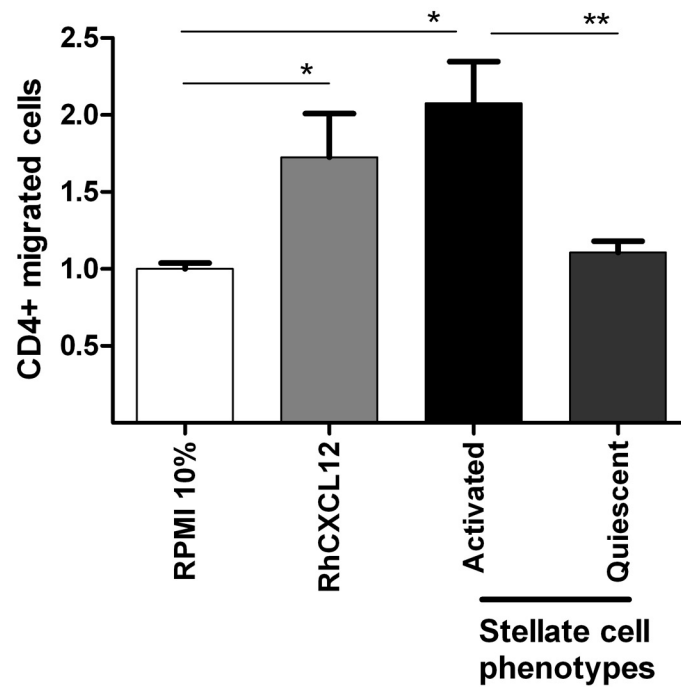

Supplement: NIHMS510952-supplement-01.pdf [file NIHMS510952-supplement-01.pdf]
